# Supplementary material for: TGF-β reduces DNA ds-break repair mechanisms to heighten genetic diversity and adaptability of CD44+/CD24− cancer cells
Source: PubMed Central journal article supplement (PMC5345931; doi:10.7554/elife.21615), 2017-01-16
Supplement: elife-21615-supp1.pdf [file elife-21615-supp1.pdf]

# Supplementary File 1

Mutation analysis of the following cells lines (used in our study) from COSMIC (Catalogue Of Somatic Mutations In Cancer <http://cancer.sanger.ac.uk/cosmic>)

Cell lines » Sample » Overview » NCI-H1650

View in GRCh37 Arc

| <a href="#">Circos</a> <a href="#">Genome Browser</a> <a href="#">Overview</a> <a href="#">Mutations</a> <a href="#">Fusions</a> <a href="#">Mutation Spectrum</a> <a href="#">Sequence Context</a> <a href="#">Heatmap</a> <a href="#">Breakpoints</a> |                                 |             |                                     |                                  |                   |              |            |                              |  |
|---------------------------------------------------------------------------------------------------------------------------------------------------------------------------------------------------------------------------------------------------------|---------------------------------|-------------|-------------------------------------|----------------------------------|-------------------|--------------|------------|------------------------------|--|
| <a href="#">Non-Coding mutation</a> <a href="#">CNV &amp; Expr</a> <a href="#">Methylation</a>                                                                                                                                                          |                                 |             |                                     |                                  |                   |              |            |                              |  |
| Show <input type="text" value="10"/> entries <span style="float: right;">Search: <input type="text"/> Export: <a href="#">CSV</a> <a href="#">TSV</a></span>                                                                                            |                                 |             |                                     |                                  |                   |              |            |                              |  |
| Gene                                                                                                                                                                                                                                                    | Transcript                      | Census Gene | AA Mutation                         | CDS Mutation                     | Somatic status    | Zygoty       | Validated  | Type                         |  |
| <a href="#">APC</a>                                                                                                                                                                                                                                     | <a href="#">ENST00000457016</a> | Yes         | <a href="#">p.A1358T</a>            | <a href="#">c.4072G&gt;A</a>     | Unknown           | Heterozygous | Unverified | Substitution - Missense      |  |
| <a href="#">CAMTA1</a>                                                                                                                                                                                                                                  | <a href="#">ENST00000303635</a> | Yes         | <a href="#">p.S239L</a>             | <a href="#">c.716C&gt;T</a>      | Unknown           | Heterozygous | Unverified | Substitution - Missense      |  |
| <a href="#">DEK</a>                                                                                                                                                                                                                                     | <a href="#">ENST00000397239</a> | Yes         | <a href="#">p.K221K</a>             | <a href="#">c.663A&gt;G</a>      | Unknown           | Homozygous   | Unverified | Substitution - coding silent |  |
| <a href="#">EGFR</a>                                                                                                                                                                                                                                    | <a href="#">ENST00000275493</a> | Yes         | <a href="#">p.E746_A750delELREA</a> | <a href="#">c.2235_2249del15</a> | Confirmed Somatic | Heterozygous | Verified   | Deletion - In frame          |  |
| <a href="#">NF1</a>                                                                                                                                                                                                                                     | <a href="#">ENST00000358273</a> | Yes         | <a href="#">p.?</a>                 | <a href="#">c.3114-7T&gt;C</a>   | Unknown           | Heterozygous | Unverified | Unknown                      |  |
| <a href="#">SBDS</a>                                                                                                                                                                                                                                    | <a href="#">ENST00000246868</a> | Yes         | <a href="#">p.I133V</a>             | <a href="#">c.397A&gt;G</a>      | Unknown           | Heterozygous | Unverified | Substitution - Missense      |  |
| <a href="#">SFPO</a>                                                                                                                                                                                                                                    | <a href="#">ENST00000357214</a> | Yes         | <a href="#">p.A651A</a>             | <a href="#">c.1953A&gt;T</a>     | Unknown           | Heterozygous | Unverified | Substitution - coding silent |  |
| <a href="#">TP53</a>                                                                                                                                                                                                                                    | <a href="#">ENST00000269305</a> | Yes         | <a href="#">p.?</a>                 | <a href="#">c.673-2A&gt;G</a>    | Confirmed Somatic | Homozygous   | Verified   | Unknown                      |  |

Showing 1 to 8 of 8 entries [First](#) [Previous](#) [1](#) [Next](#) [Last](#)

[Circos](#)
[Genome Browser](#)
[Overview](#)
[Mutations](#)
[Fusions](#)
[Mutation Spectrum](#)
[Sequence Context](#)
[Heatmap](#)
[Breakpoints](#)

[Non-Coding mutation](#)
[CNV & Expr](#)
[Methylation](#)

Show  entries Search:  Export:

| Gene                    | Transcript                      | Census Gene | AA Mutation                | CDS Mutation                     | Somatic status      | Zygoty       | Validated  | Type                         |
|-------------------------|---------------------------------|-------------|----------------------------|----------------------------------|---------------------|--------------|------------|------------------------------|
| <a href="#">ATR</a>     | <a href="#">NM_001184</a>       | Yes         | <a href="#">p.??</a>       | <a href="#">c.2634-1G&gt;A</a>   | Unknown             | Heterozygous | Unverified | Unknown                      |
| <a href="#">ATR</a>     | <a href="#">NM_001184</a>       | Yes         | <a href="#">p.Q1441Q</a>   | <a href="#">c.4323A&gt;G</a>     | Unknown             | Heterozygous | Unverified | Substitution - coding silent |
| <a href="#">CARD11</a>  | <a href="#">ENST00000396946</a> | Yes         | <a href="#">p.M1124I</a>   | <a href="#">c.3372G&gt;A</a>     | Unknown             | Heterozygous | Unverified | Substitution - Missense      |
| <a href="#">CBL</a>     | <a href="#">ENST00000264033</a> | Yes         | <a href="#">p.R585C</a>    | <a href="#">c.1753C&gt;T</a>     | Unknown             | Homozygous   | Unverified | Substitution - Missense      |
| <a href="#">CTNNA1</a>  | <a href="#">ENST00000302763</a> | Yes         | <a href="#">p.E865*</a>    | <a href="#">c.2593G&gt;T</a>     | Unknown             | Heterozygous | Unverified | Substitution - Nonsense      |
| <a href="#">ERC1</a>    | <a href="#">ENST00000397203</a> | Yes         | <a href="#">p.T1032T</a>   | <a href="#">c.3096C&gt;A</a>     | Unknown             | Homozygous   | Unverified | Substitution - coding silent |
| <a href="#">FH</a>      | <a href="#">ENST00000366560</a> | Yes         | <a href="#">p.G464V</a>    | <a href="#">c.1391G&gt;T</a>     | Previously Reported | Heterozygous | Unverified | Substitution - Missense      |
| <a href="#">FLT3</a>    | <a href="#">ENST00000241453</a> | Yes         | <a href="#">p.N323K</a>    | <a href="#">c.969C&gt;A</a>      | Unknown             | Heterozygous | Unverified | Substitution - Missense      |
| <a href="#">FUS</a>     | <a href="#">ENST00000254108</a> | Yes         | <a href="#">p.R383H</a>    | <a href="#">c.1148G&gt;A</a>     | Unknown             | Heterozygous | Unverified | Substitution - Missense      |
| <a href="#">HIP1</a>    | <a href="#">ENST00000336926</a> | Yes         | <a href="#">p.S277N</a>    | <a href="#">c.830G&gt;A</a>      | Previously Reported | Heterozygous | Unverified | Substitution - Missense      |
| <a href="#">KRAS</a>    | <a href="#">ENST00000311936</a> | Yes         | <a href="#">p.G12S</a>     | <a href="#">c.34G&gt;A</a>       | Confirmed Somatic   | Homozygous   | Verified   | Substitution - Missense      |
| <a href="#">PCSK7</a>   | <a href="#">ENST00000320934</a> | Yes         | <a href="#">p.?</a>        | <a href="#">c.1156-9C&gt;T</a>   | Unknown             | Homozygous   | Unverified | Unknown                      |
| <a href="#">POLE</a>    | <a href="#">ENST00000320574</a> | Yes         | <a href="#">p.Q1475Q</a>   | <a href="#">c.4425G&gt;A</a>     | Unknown             | Heterozygous | Unverified | Substitution - coding silent |
| <a href="#">SMARCA4</a> | <a href="#">ENST00000429416</a> | Yes         | <a href="#">p.Q729fs*4</a> | <a href="#">c.2184_2206del23</a> | Confirmed Somatic   | Heterozygous | Verified   | Deletion - Frameshift        |
| <a href="#">SMARCA4</a> | <a href="#">ENST00000429416</a> | Yes         | <a href="#">p.Q729fs*4</a> | <a href="#">c.2184_2206del23</a> | Previously Reported | Homozygous   | Verified   | Deletion - Frameshift        |
| <a href="#">STK11</a>   | <a href="#">ENST00000326873</a> | Yes         | <a href="#">p.Q37*</a>     | <a href="#">c.109C&gt;T</a>      | Confirmed Somatic   | Homozygous   | Verified   | Substitution - Nonsense      |
| <a href="#">SUFU</a>    | <a href="#">ENST00000369902</a> | Yes         | <a href="#">p.T411M</a>    | <a href="#">c.1232C&gt;T</a>     | Previously Reported | Heterozygous | Unverified | Substitution - Missense      |
| <a href="#">TBL1XR1</a> | <a href="#">ENST00000430069</a> | Yes         | <a href="#">p.T290A</a>    | <a href="#">c.868A&gt;G</a>      | Unknown             | Homozygous   | Unverified | Substitution - Missense      |
| <a href="#">USP6</a>    | <a href="#">NM_004505.1</a>     | Yes         | <a href="#">p.P31T</a>     | <a href="#">c.91C&gt;A</a>       | Unknown             | Heterozygous | Unverified | Substitution - Missense      |

Showing 1 to 19 of 19 entries [First](#) [Previous](#) [1](#) [Next](#)

Show  entries

Search:  Export: [CSV](#) [TSV](#) [?](#)

| Gene                    | Transcript                      | Census Gene | AA Mutation                          | CDS Mutation                     | Somatic status      | Zygoty       | Validated  | Type                         |
|-------------------------|---------------------------------|-------------|--------------------------------------|----------------------------------|---------------------|--------------|------------|------------------------------|
| <a href="#">ATP2B3</a>  | <a href="#">ENST00000359149</a> | Yes         | <a href="#">p.V882E</a>              | <a href="#">c.2645T&gt;A</a>     | Previously Reported | Heterozygous | Unverified | Substitution - Missense      |
| <a href="#">BCR</a>     | <a href="#">ENST00000305877</a> | Yes         | <a href="#">p.I456T</a>              | <a href="#">c.1367T&gt;C</a>     | Unknown             | Heterozygous | Unverified | Substitution - Missense      |
| <a href="#">CLIP1</a>   | <a href="#">ENST00000358808</a> | Yes         | <a href="#">p.N890S</a>              | <a href="#">c.2669A&gt;G</a>     | Unknown             | Heterozygous | Unverified | Substitution - Missense      |
| <a href="#">DNM2</a>    | <a href="#">ENST00000355667</a> | Yes         | <a href="#">p.A800V</a>              | <a href="#">c.2399C&gt;T</a>     | Previously Reported | Heterozygous | Unverified | Substitution - Missense      |
| <a href="#">ECT2L</a>   | <a href="#">ENST00000367682</a> | Yes         | <a href="#">p.T727T</a>              | <a href="#">c.2181C&gt;T</a>     | Unknown             | Heterozygous | Unverified | Substitution - coding silent |
| <a href="#">EP300</a>   | <a href="#">ENST00000263253</a> | Yes         | <a href="#">p.R1356*</a>             | <a href="#">c.4066C&gt;T</a>     | Previously Reported | Heterozygous | Unverified | Substitution - Nonsense      |
| <a href="#">FLT3</a>    | <a href="#">ENST00000241453</a> | Yes         | <a href="#">p.C368Y</a>              | <a href="#">c.1103G&gt;A</a>     | Unknown             | Heterozygous | Unverified | Substitution - Missense      |
| <a href="#">FLT3</a>    | <a href="#">ENST00000241453</a> | Yes         | <a href="#">p.C368S</a>              | <a href="#">c.1102T&gt;A</a>     | Unknown             | Heterozygous | Unverified | Substitution - Missense      |
| <a href="#">GATA3</a>   | <a href="#">ENST00000379328</a> | Yes         | <a href="#">p.D336fs*17</a>          | <a href="#">c.1006_1007insG</a>  | Previously Reported | Heterozygous | Unverified | Insertion - Frameshift       |
| <a href="#">MAP3K13</a> | <a href="#">ENST00000424227</a> | Yes         | <a href="#">p.D380N</a>              | <a href="#">c.1138G&gt;A</a>     | Previously Reported | Heterozygous | Unverified | Substitution - Missense      |
| <a href="#">MYH9</a>    | <a href="#">ENST00000216181</a> | Yes         | <a href="#">p.K682_L687delKLDPHL</a> | <a href="#">c.2044_2061del18</a> | Unknown             | Heterozygous | Unverified | Deletion - In frame          |
| <a href="#">NBN</a>     | <a href="#">ENST00000265433</a> | Yes         | <a href="#">p.R43*</a>               | <a href="#">c.127C&gt;T</a>      | Unknown             | Heterozygous | Unverified | Substitution - Nonsense      |
| <a href="#">PALB2</a>   | <a href="#">ENST00000261584</a> | Yes         | <a href="#">p.V560L</a>              | <a href="#">c.1678G&gt;C</a>     | Unknown             | Heterozygous | Unverified | Substitution - Missense      |
| <a href="#">PIK3CA</a>  | <a href="#">NM_006218.1</a>     | Yes         | <a href="#">p.E545K</a>              | <a href="#">c.1633G&gt;A</a>     | Confirmed Somatic   | Heterozygous | Verified   | Substitution - Missense      |

Showing 1 to 14 of 14 entries

[First](#) [Previous](#) [1](#) [Next](#) [Last](#)

| Circos                   | Genome Browser                  | Overview    | Mutations                   | Fusions                        | Mutation Spectrum   | Sequence Context | Heatmap    | Breakpoints                  |
|--------------------------|---------------------------------|-------------|-----------------------------|--------------------------------|---------------------|------------------|------------|------------------------------|
| Non-Coding mutation      | CNV & Expr                      | Methylation |                             |                                |                     |                  |            |                              |
| Show                     | 100                             | entries     | Search:                     |                                |                     | Export:          | CSV        | TSV                          |
| Gene                     | Transcript                      | Census Gene | AA Mutation                 | CDS Mutation                   | Somatic status      | Zygosity         | Validated  | Type                         |
| <a href="#">AFF3</a>     | <a href="#">ENST00000409579</a> | Yes         | <a href="#">p.N983N</a>     | <a href="#">c.2949C&gt;T</a>   | Unknown             | Heterozygous     | Verified   | Substitution - coding silent |
| <a href="#">AFF3</a>     | <a href="#">ENST00000409579</a> | Yes         | <a href="#">p.S1112*</a>    | <a href="#">c.3335C&gt;G</a>   | Unknown             | Heterozygous     | Unverified | Substitution - Nonsense      |
| <a href="#">ARHGFE12</a> | <a href="#">ENST00000397843</a> | Yes         | <a href="#">p.Q933E</a>     | <a href="#">c.2797C&gt;G</a>   | Unknown             | Heterozygous     | Unverified | Substitution - Missense      |
| <a href="#">ATM</a>      | <a href="#">ENST00000278616</a> | Yes         | <a href="#">p.E2468K</a>    | <a href="#">c.7402G&gt;A</a>   | Unknown             | Heterozygous     | Unverified | Substitution - Missense      |
| <a href="#">AXIN1</a>    | <a href="#">ENST00000262320</a> | Yes         | <a href="#">p.?</a>         | <a href="#">c.2186+8C&gt;T</a> | Unknown             | Heterozygous     | Unverified | Unknown                      |
| <a href="#">BCOR</a>     | <a href="#">ENST00000397354</a> | Yes         | <a href="#">p.H457P</a>     | <a href="#">c.1370A&gt;C</a>   | Unknown             | Homozygous       | Unverified | Substitution - Missense      |
| <a href="#">BRCA2</a>    | <a href="#">ENST00000380152</a> | Yes         | <a href="#">p.S3094*</a>    | <a href="#">c.9281C&gt;A</a>   | Unknown             | Heterozygous     | Unverified | Substitution - Nonsense      |
| <a href="#">BRIP1</a>    | <a href="#">ENST00000259008</a> | Yes         | <a href="#">p.S230L</a>     | <a href="#">c.689C&gt;T</a>    | Unknown             | Heterozygous     | Unverified | Substitution - Missense      |
| <a href="#">BUB1B</a>    | <a href="#">ENST00000287598</a> | Yes         | <a href="#">p.S521F</a>     | <a href="#">c.1562C&gt;T</a>   | Unknown             | Heterozygous     | Unverified | Substitution - Missense      |
| <a href="#">CARD11</a>   | <a href="#">ENST00000396946</a> | Yes         | <a href="#">p.L15L</a>      | <a href="#">c.45G&gt;A</a>     | Previously Reported | Heterozygous     | Unverified | Substitution - coding silent |
| <a href="#">CCND1</a>    | <a href="#">ENST00000227507</a> | Yes         | <a href="#">p.L217L</a>     | <a href="#">c.651G&gt;C</a>    | Unknown             | Heterozygous     | Unverified | Substitution - coding silent |
| <a href="#">CIC</a>      | <a href="#">ENST00000160740</a> | Yes         | <a href="#">p.L1467V</a>    | <a href="#">c.4399C&gt;G</a>   | Unknown             | Heterozygous     | Unverified | Substitution - Missense      |
| <a href="#">COL2A1</a>   | <a href="#">ENST00000337299</a> | Yes         | <a href="#">p.G669S</a>     | <a href="#">c.2005G&gt;A</a>   | Unknown             | Heterozygous     | Unverified | Substitution - Missense      |
| <a href="#">EGFR</a>     | <a href="#">ENST00000275493</a> | Yes         | <a href="#">p.D1014D</a>    | <a href="#">c.3042C&gt;T</a>   | Unknown             | Heterozygous     | Unverified | Substitution - coding silent |
| <a href="#">EPS15</a>    | <a href="#">ENST00000371733</a> | Yes         | <a href="#">p.G522E</a>     | <a href="#">c.1565G&gt;A</a>   | Previously Reported | Heterozygous     | Unverified | Substitution - Missense      |
| <a href="#">FANCA</a>    | <a href="#">ENST00000389301</a> | Yes         | <a href="#">p.L684L</a>     | <a href="#">c.2052G&gt;A</a>   | Unknown             | Heterozygous     | Unverified | Substitution - coding silent |
| <a href="#">FANCA</a>    | <a href="#">ENST00000389301</a> | Yes         | <a href="#">p.S1114fs*3</a> | <a href="#">c.3340delT</a>     | Unknown             | Heterozygous     | Unverified | Deletion - Frameshift        |
| <a href="#">FLT4</a>     | <a href="#">ENST00000393347</a> | Yes         | <a href="#">p.?</a>         | <a href="#">c.3431+7C&gt;T</a> | Unknown             | Heterozygous     | Unverified | Unknown                      |
| <a href="#">FLT4</a>     | <a href="#">ENST00000393347</a> | Yes         | <a href="#">p.A634T</a>     | <a href="#">c.1900G&gt;A</a>   | Unknown             | Heterozygous     | Unverified | Substitution - Missense      |
| <a href="#">GNA11</a>    | <a href="#">ENST00000078429</a> | Yes         | <a href="#">p.I167I</a>     | <a href="#">c.501C&gt;T</a>    | Unknown             | Homozygous       | Unverified | Substitution - coding silent |
| <a href="#">HIST1H3B</a> | <a href="#">ENST00000244661</a> | Yes         | <a href="#">p.R135T</a>     | <a href="#">c.404G&gt;C</a>    | Unknown             | Heterozygous     | Unverified | Substitution - Missense      |
| <a href="#">HNF1A</a>    | <a href="#">ENST00000257555</a> | Yes         | <a href="#">p.Q495*</a>     | <a href="#">c.1483C&gt;T</a>   | Unknown             | Heterozygous     | Unverified | Substitution - Nonsense      |
| <a href="#">HOXA13</a>   | <a href="#">ENST00000222753</a> | Yes         | <a href="#">p.S314L</a>     | <a href="#">c.941C&gt;T</a>    | Unknown             | Heterozygous     | Unverified | Substitution - Missense      |
| <a href="#">KIF5B</a>    | <a href="#">ENST00000302418</a> | Yes         | <a href="#">p.Q734E</a>     | <a href="#">c.2200C&gt;G</a>   | Unknown             | Heterozygous     | Unverified | Substitution - Missense      |
| <a href="#">KMT2D</a>    | <a href="#">ENST00000301067</a> | Yes         | <a href="#">p.E1350K</a>    | <a href="#">c.4048G&gt;A</a>   | Unknown             | Heterozygous     | Unverified | Substitution - Missense      |
| <a href="#">NCOR1</a>    | <a href="#">ENST00000268712</a> | Yes         | <a href="#">p.?</a>         | <a href="#">c.6734-3C&gt;T</a> | Unknown             | Heterozygous     | Unverified | Unknown                      |
| <a href="#">NSD1</a>     | <a href="#">ENST00000439151</a> | Yes         | <a href="#">p.S1654C</a>    | <a href="#">c.4961C&gt;G</a>   | Unknown             | Heterozygous     | Unverified | Substitution - Missense      |
| <a href="#">NSD1</a>     | <a href="#">ENST00000439151</a> | Yes         | <a href="#">p.L2063V</a>    | <a href="#">c.6187C&gt;G</a>   | Unknown             | Heterozygous     | Unverified | Substitution - Missense      |
| <a href="#">NUMA1</a>    | <a href="#">ENST00000393695</a> | Yes         | <a href="#">p.E1479Q</a>    | <a href="#">c.4435G&gt;C</a>   | Unknown             | Homozygous       | Unverified | Substitution - Missense      |
| <a href="#">PAX3</a>     | <a href="#">ENST00000392069</a> | Yes         | <a href="#">p.P373P</a>     | <a href="#">c.1119G&gt;A</a>   | Unknown             | Heterozygous     | Unverified | Substitution - coding silent |
| <a href="#">PDE4DIP</a>  | <a href="#">ENST00000369354</a> | Yes         | <a href="#">p.D371N</a>     | <a href="#">c.1111G&gt;A</a>   | Unknown             | Heterozygous     | Unverified | Substitution - Missense      |
| <a href="#">PIK3CA</a>   | <a href="#">NM_006218.1</a>     | Yes         | <a href="#">p.K111N</a>     | <a href="#">c.333G&gt;C</a>    | Confirmed Somatic   | Heterozygous     | Verified   | Substitution - Missense      |

Circos Genome Browser Overview **Mutations** Fusions Mutation Spectrum Sequence Context Heatmap Breakpoints  
 Non-Coding mutation CNV & Expr Methylation

Show 100 entries Search: Export: CSV TSV ?

| Gene                     | Transcript                      | Census Gene | AA Mutation                 | CDS Mutation                   | Somatic status      | Zygoty       | Validated  | Type                         |
|--------------------------|---------------------------------|-------------|-----------------------------|--------------------------------|---------------------|--------------|------------|------------------------------|
| <a href="#">PLAG1</a>    | <a href="#">ENST00000316981</a> | Yes         | <a href="#">p.D14H</a>      | <a href="#">c.40G&gt;C</a>     | Unknown             | Heterozygous | Unverified | Substitution - Missense      |
| <a href="#">PML</a>      | <a href="#">ENST00000268058</a> | Yes         | <a href="#">p.L869R</a>     | <a href="#">c.2605T&gt;G</a>   | Unknown             | Heterozygous | Unverified | Substitution - Missense      |
| <a href="#">PMS1</a>     | <a href="#">ENST00000441310</a> | Yes         | <a href="#">p.K156R</a>     | <a href="#">c.467A&gt;G</a>    | Unknown             | Heterozygous | Unverified | Substitution - Missense      |
| <a href="#">PPFIBP1</a>  | <a href="#">ENST00000228425</a> | Yes         | <a href="#">p.V122M</a>     | <a href="#">c.364G&gt;A</a>    | Unknown             | Heterozygous | Unverified | Substitution - Missense      |
| <a href="#">PPP2R1A</a>  | <a href="#">ENST00000322088</a> | Yes         | <a href="#">p.S143F</a>     | <a href="#">c.428C&gt;T</a>    | Previously Reported | Heterozygous | Unverified | Substitution - Missense      |
| <a href="#">PTPRK</a>    | <a href="#">ENST00000368226</a> | Yes         | <a href="#">p.D884N</a>     | <a href="#">c.2650G&gt;A</a>   | Unknown             | Heterozygous | Unverified | Substitution - Missense      |
| <a href="#">RAP1GDS1</a> | <a href="#">ENST00000453712</a> | Yes         | <a href="#">p.H122Y</a>     | <a href="#">c.364C&gt;T</a>    | Unknown             | Heterozygous | Unverified | Substitution - Missense      |
| <a href="#">RECQL4</a>   | <a href="#">ENST00000617875</a> | Yes         | <a href="#">p.M989R</a>     | <a href="#">c.2966T&gt;G</a>   | Unknown             | Heterozygous | Unverified | Substitution - Missense      |
| <a href="#">RHQA</a>     | <a href="#">ENST00000418115</a> | Yes         | <a href="#">p.G17E</a>      | <a href="#">c.50G&gt;A</a>     | Previously Reported | Heterozygous | Unverified | Substitution - Missense      |
| <a href="#">RNF213</a>   | <a href="#">ENST00000336301</a> | Yes         | <a href="#">p.V1085V</a>    | <a href="#">c.3255C&gt;T</a>   | Unknown             | Heterozygous | Unverified | Substitution - coding silent |
| <a href="#">RNF213</a>   | <a href="#">ENST00000336301</a> | Yes         | <a href="#">p.L1176L</a>    | <a href="#">c.3528C&gt;G</a>   | Unknown             | Heterozygous | Unverified | Substitution - coding silent |
| <a href="#">ROS1</a>     | <a href="#">ENST00000368508</a> | Yes         | <a href="#">p.V1916L</a>    | <a href="#">c.5746G&gt;T</a>   | Unknown             | Heterozygous | Unverified | Substitution - Missense      |
| <a href="#">SMARCB1</a>  | <a href="#">ENST00000263121</a> | Yes         | <a href="#">p.F328F</a>     | <a href="#">c.984C&gt;T</a>    | Unknown             | Heterozygous | Unverified | Substitution - coding silent |
| <a href="#">SS18</a>     | <a href="#">ENST00000415083</a> | Yes         | <a href="#">p.D293N</a>     | <a href="#">c.877G&gt;A</a>    | Unknown             | Heterozygous | Unverified | Substitution - Missense      |
| <a href="#">SSX1</a>     | <a href="#">ENST00000376919</a> | Yes         | <a href="#">p.E149G</a>     | <a href="#">c.446A&gt;G</a>    | Previously Reported | Heterozygous | Unverified | Substitution - Missense      |
| <a href="#">STAT3</a>    | <a href="#">ENST00000264657</a> | Yes         | <a href="#">p.F174L</a>     | <a href="#">c.522C&gt;G</a>    | Unknown             | Heterozygous | Unverified | Substitution - Missense      |
| <a href="#">TFRC</a>     | <a href="#">ENST00000360110</a> | Yes         | <a href="#">p.V108V</a>     | <a href="#">c.324G&gt;T</a>    | Unknown             | Heterozygous | Unverified | Substitution - coding silent |
| <a href="#">TFRC</a>     | <a href="#">ENST00000360110</a> | Yes         | <a href="#">p.?</a>         | <a href="#">c.1405-9C&gt;G</a> | Unknown             | Heterozygous | Unverified | Unknown                      |
| <a href="#">TP53</a>     | <a href="#">ENST00000269305</a> | Yes         | <a href="#">p.E285K</a>     | <a href="#">c.853G&gt;A</a>    | Confirmed Somatic   | Homozygous   | Verified   | Substitution - Missense      |
| <a href="#">TPM3</a>     | <a href="#">ENST00000368533</a> | Yes         | <a href="#">p.R208fs*10</a> | <a href="#">c.623_624delGA</a> | Unknown             | Heterozygous | Unverified | Deletion - Frameshift        |
| <a href="#">WRN</a>      | <a href="#">ENST00000298139</a> | Yes         | <a href="#">p.E764G</a>     | <a href="#">c.2291A&gt;G</a>   | Unknown             | Heterozygous | Unverified | Substitution - Missense      |
| <a href="#">WRN</a>      | <a href="#">ENST00000298139</a> | Yes         | <a href="#">p.H945N</a>     | <a href="#">c.2833C&gt;A</a>   | Unknown             | Heterozygous | Unverified | Substitution - Missense      |

Showing 1 to 54 of 54 entries

First Previous 1 Next Last

| Overview                                                                                                 | Mutations                                                                                                         | Fusions     | Non-Mutant Genes                    | CNV & Expr                       | Methylation         | Studies      | References |                     |  |
|----------------------------------------------------------------------------------------------------------|-------------------------------------------------------------------------------------------------------------------|-------------|-------------------------------------|----------------------------------|---------------------|--------------|------------|---------------------|--|
| Gene                                                                                                     | Transcript                                                                                                        | Census Gene | AA Mutation                         | CDS Mutation                     | Somatic status      | Zygoty       | Validated  | Type                |  |
| <a href="#">EGFR</a><br> | <a href="#">ENST00000275493</a>  | Yes         | <a href="#">p.E746_A750delELREA</a> | <a href="#">c.2235_2249del15</a> | Previously Reported | Heterozygous | Unverified | Deletion - In frame |  |

Showing 1 to 1 of 1 entries

First Previous 1 Next La

Circos Genome Browser Overview Mutations Fusions Mutation Spectrum Sequence Context Heatmap Breakpoints  
 Non-Coding mutation CNV & Expr Methylation

| Gene                    | Transcript                      | Census Gene | AA Mutation                         | CDS Mutation                        | Somatic status      | Zygosity     | Validated  | Type                            |
|-------------------------|---------------------------------|-------------|-------------------------------------|-------------------------------------|---------------------|--------------|------------|---------------------------------|
| <a href="#">ACSL6</a>   | <a href="#">ENST00000296869</a> | Yes         | <a href="#">p.?</a>                 | <a href="#">c.1507+1G&gt;T</a>      | Unknown             | Heterozygous | Unverified | Unknown                         |
| <a href="#">ALK</a>     | <a href="#">ENST00000389048</a> | Yes         | <a href="#">p.L1035L</a>            | <a href="#">c.3105G&gt;A</a>        | Unknown             | Heterozygous | Unverified | Substitution - coding silent    |
| <a href="#">ARID1B</a>  | <a href="#">ENST00000275248</a> | Yes         | <a href="#">p.A1917A</a>            | <a href="#">c.5751G&gt;T</a>        | Unknown             | Homozygous   | Unverified | Substitution - coding silent    |
| <a href="#">ARID2</a>   | <a href="#">ENST00000334344</a> | Yes         | <a href="#">p.M452V</a>             | <a href="#">c.1354A&gt;G</a>        | Previously Reported | Heterozygous | Unverified | Substitution - Missense         |
| <a href="#">ASXL1</a>   | <a href="#">ENST00000375687</a> | Yes         | <a href="#">p.Y1087H</a>            | <a href="#">c.3259T&gt;C</a>        | Unknown             | Heterozygous | Unverified | Substitution - Missense         |
| <a href="#">ATM</a>     | <a href="#">ENST00000278616</a> | Yes         | <a href="#">p.Q1919P</a>            | <a href="#">c.5756A&gt;C</a>        | Unknown             | Homozygous   | Unverified | Substitution - Missense         |
| <a href="#">AXIN2</a>   | <a href="#">ENST00000307078</a> | Yes         | <a href="#">p.T586T</a>             | <a href="#">c.1758G&gt;A</a>        | Unknown             | Heterozygous | Unverified | Substitution - coding silent    |
| <a href="#">BCR</a>     | <a href="#">ENST00000305877</a> | Yes         | <a href="#">p.R567H</a>             | <a href="#">c.1700G&gt;A</a>        | Unknown             | Heterozygous | Unverified | Substitution - Missense         |
| <a href="#">BRIP1</a>   | <a href="#">ENST00000259008</a> | Yes         | <a href="#">p.E1054A</a>            | <a href="#">c.3161A&gt;C</a>        | Unknown             | Heterozygous | Unverified | Substitution - Missense         |
| <a href="#">CCNE1</a>   | <a href="#">ENST00000262643</a> | Yes         | <a href="#">p.D83N</a>              | <a href="#">c.247G&gt;A</a>         | Unknown             | Heterozygous | Unverified | Substitution - Missense         |
| <a href="#">CIC</a>     | <a href="#">ENST00000160740</a> | Yes         | <a href="#">p.S1031S</a>            | <a href="#">c.3093G&gt;C</a>        | Unknown             | Homozygous   | Unverified | Substitution - coding silent    |
| <a href="#">CSF1R</a>   | <a href="#">ENST00000286301</a> | Yes         | <a href="#">p.R710R</a>             | <a href="#">c.2130C&gt;T</a>        | Unknown             | Heterozygous | Unverified | Substitution - coding silent    |
| <a href="#">CSF1R</a>   | <a href="#">ENST00000286301</a> | Yes         | <a href="#">p.P202S</a>             | <a href="#">c.604C&gt;T</a>         | Unknown             | Heterozygous | Unverified | Substitution - Missense         |
| <a href="#">DDX6</a>    | <a href="#">NM_004397.3</a>     | Yes         | <a href="#">p.?</a>                 | <a href="#">c.1141+5G&gt;A</a>      | Unknown             | Heterozygous | Unverified | Unknown                         |
| <a href="#">DICER1</a>  | <a href="#">ENST00000343455</a> | Yes         | <a href="#">p.E732E</a>             | <a href="#">c.2196A&gt;G</a>        | Unknown             | Heterozygous | Unverified | Substitution - coding silent    |
| <a href="#">DNMT3A</a>  | <a href="#">ENST00000321117</a> | Yes         | <a href="#">p.G223*</a>             | <a href="#">c.667G&gt;T</a>         | Previously Reported | Heterozygous | Unverified | Substitution - Nonsense         |
| <a href="#">EBF1</a>    | <a href="#">ENST00000313708</a> | Yes         | <a href="#">p.P339Q</a>             | <a href="#">c.1016C&gt;A</a>        | Previously Reported | Heterozygous | Unverified | Substitution - Missense         |
| <a href="#">FGFR2</a>   | <a href="#">ENST00000358487</a> | Yes         | <a href="#">p.Y328S</a>             | <a href="#">c.983A&gt;C</a>         | Unknown             | Homozygous   | Unverified | Substitution - Missense         |
| <a href="#">FLT3</a>    | <a href="#">ENST00000241453</a> | Yes         | <a href="#">p.P738H</a>             | <a href="#">c.2213C&gt;A</a>        | Unknown             | Heterozygous | Unverified | Substitution - Missense         |
| <a href="#">GMPS</a>    | <a href="#">ENST00000496455</a> | Yes         | <a href="#">p.V613L</a>             | <a href="#">c.1837G&gt;T</a>        | Unknown             | Heterozygous | Unverified | Substitution - Missense         |
| <a href="#">GMPS</a>    | <a href="#">ENST00000496455</a> | Yes         | <a href="#">p.P612P</a>             | <a href="#">c.1836G&gt;T</a>        | Previously Reported | Heterozygous | Unverified | Substitution - coding silent    |
| <a href="#">GPC3</a>    | <a href="#">ENST00000370818</a> | Yes         | <a href="#">p.V289L</a>             | <a href="#">c.865G&gt;T</a>         | Previously Reported | Homozygous   | Unverified | Substitution - Missense         |
| <a href="#">KAT6B</a>   | <a href="#">ENST00000287239</a> | Yes         | <a href="#">p.G1134C</a>            | <a href="#">c.3400G&gt;T</a>        | Previously Reported | Homozygous   | Unverified | Substitution - Missense         |
| <a href="#">KMT2D</a>   | <a href="#">ENST00000301067</a> | Yes         | <a href="#">p.G3195V</a>            | <a href="#">c.9584G&gt;T</a>        | Unknown             | Heterozygous | Unverified | Substitution - Missense         |
| <a href="#">KRAS</a>    | <a href="#">ENST00000311936</a> | Yes         | <a href="#">p.G12C</a>              | <a href="#">c.34G&gt;T</a>          | Confirmed Somatic   | Heterozygous | Verified   | Substitution - Missense         |
| <a href="#">NBN</a>     | <a href="#">ENST00000265433</a> | Yes         | <a href="#">p.V153I</a>             | <a href="#">c.457G&gt;A</a>         | Unknown             | Heterozygous | Unverified | Substitution - Missense         |
| <a href="#">NIN</a>     | <a href="#">ENST00000382041</a> | Yes         | <a href="#">p.P1987S</a>            | <a href="#">c.5959C&gt;T</a>        | Unknown             | Heterozygous | Unverified | Substitution - Missense         |
| <a href="#">NTRK3</a>   | <a href="#">ENST00000394480</a> | Yes         | <a href="#">p.?</a>                 | <a href="#">c.2293-10A&gt;T</a>     | Unknown             | Heterozygous | Unverified | Unknown                         |
| <a href="#">PDE4DJP</a> | <a href="#">ENST00000369354</a> | Yes         | <a href="#">p.V1261L</a>            | <a href="#">c.3781G&gt;T</a>        | Unknown             | Heterozygous | Unverified | Substitution - Missense         |
| <a href="#">PDGFRA</a>  | <a href="#">ENST00000257290</a> | Yes         | <a href="#">p.P250H</a>             | <a href="#">c.749C&gt;A</a>         | Previously Reported | Heterozygous | Unverified | Substitution - Missense         |
| <a href="#">PMS2</a>    | <a href="#">ENST00000265849</a> | Yes         | <a href="#">p.E491K</a>             | <a href="#">c.1471G&gt;A</a>        | Unknown             | Heterozygous | Unverified | Substitution - Missense         |
| <a href="#">PTRR8</a>   | <a href="#">NM_002837.2</a>     | Yes         | <a href="#">p.T1280M</a>            | <a href="#">c.3839C&gt;T</a>        | Unknown             | Heterozygous | Unverified | Substitution - Missense         |
| <a href="#">RANBP2</a>  | <a href="#">ENST00000283195</a> | Yes         | <a href="#">p.D387N</a>             | <a href="#">c.1159G&gt;A</a>        | Unknown             | Heterozygous | Unverified | Substitution - Missense         |
| <a href="#">SETBP1</a>  | <a href="#">ENST00000282030</a> | Yes         | <a href="#">p.Q1244R</a>            | <a href="#">c.3731A&gt;G</a>        | Unknown             | Homozygous   | Unverified | Substitution - Missense         |
| <a href="#">SMARCA4</a> | <a href="#">ENST00000429416</a> | Yes         | <a href="#">p.K1566_E1567&gt;N*</a> | <a href="#">c.4698_4699GG&gt;TT</a> | Unknown             | Homozygous   | Verified   | Complex - compound substitution |
| <a href="#">STK11</a>   | <a href="#">ENST00000326873</a> | Yes         | <a href="#">p.W332*</a>             | <a href="#">c.996G&gt;A</a>         | Confirmed Somatic   | Homozygous   | Verified   | Substitution - Nonsense         |
| <a href="#">TP53</a>    | <a href="#">ENST00000269305</a> | Yes         | <a href="#">p.M246I</a>             | <a href="#">c.738G&gt;C</a>         | Confirmed Somatic   | Homozygous   | Verified   | Substitution - Missense         |
| <a href="#">TRRAP</a>   | <a href="#">ENST00000355540</a> | Yes         | <a href="#">p.Y2267Y</a>            | <a href="#">c.6801C&gt;T</a>        | Unknown             | Heterozygous | Unverified | Substitution - coding silent    |
| <a href="#">USP6</a>    | <a href="#">NM_004505.1</a>     | Yes         | <a href="#">p.T693T</a>             | <a href="#">c.2079A&gt;G</a>        | Unknown             | Heterozygous | Unverified | Substitution - coding silent    |

Show 25 entries Search: Export: [CSV](#) [TSV](#)

| Gene                    | Transcript                      | Census Gene | AA Mutation | CDS Mutation                    | Somatic status      | Zygosity     | Validated  | Type                         |
|-------------------------|---------------------------------|-------------|-------------|---------------------------------|---------------------|--------------|------------|------------------------------|
| <a href="#">ATM</a>     | <a href="#">ENST00000278616</a> | Yes         | p.?         | <a href="#">c.4237-9A&gt;G</a>  | Unknown             | Heterozygous | Unverified | Unknown                      |
| <a href="#">ATM</a>     | <a href="#">ENST00000278616</a> | Yes         | p.N100SI    | <a href="#">c.3014A&gt;T</a>    | Unknown             | Heterozygous | Unverified | Substitution - Missense      |
| <a href="#">AXIN2</a>   | <a href="#">ENST00000307078</a> | Yes         | p.?         | <a href="#">c.1713-8C&gt;T</a>  | Unknown             | Heterozygous | Unverified | Unknown                      |
| <a href="#">BRAF</a>    | <a href="#">ENST00000288602</a> | Yes         | p.G464V     | <a href="#">c.1391G&gt;T</a>    | Confirmed Somatic   | Heterozygous | Verified   | Substitution - Missense      |
| <a href="#">CASP8</a>   | <a href="#">ENST00000264275</a> | Yes         | p.L132L     | <a href="#">c.396A&gt;G</a>     | Unknown             | Heterozygous | Unverified | Substitution - coding silent |
| <a href="#">CD79A</a>   | <a href="#">ENST00000221972</a> | Yes         | p.C106Y     | <a href="#">c.317G&gt;A</a>     | Previously Reported | Heterozygous | Unverified | Substitution - Missense      |
| <a href="#">CLTC1</a>   | <a href="#">ENST00000263200</a> | Yes         | p.D1485N    | <a href="#">c.4453G&gt;A</a>    | Previously Reported | Heterozygous | Unverified | Substitution - Missense      |
| <a href="#">CRT3</a>    | <a href="#">ENST00000268184</a> | Yes         | p.P578A     | <a href="#">c.1732C&gt;G</a>    | Previously Reported | Heterozygous | Unverified | Substitution - Missense      |
| <a href="#">EXT2</a>    | <a href="#">ENST00000533608</a> | Yes         | p.E672E     | <a href="#">c.2016G&gt;A</a>    | Unknown             | Heterozygous | Unverified | Substitution - coding silent |
| <a href="#">GAS7</a>    | <a href="#">ENST00000432992</a> | Yes         | p.?         | <a href="#">c.1218+8G&gt;T</a>  | Unknown             | Homozygous   | Unverified | Unknown                      |
| <a href="#">GNAS</a>    | <a href="#">ENST00000371085</a> | Yes         | p.N6N       | <a href="#">c.18C&gt;T</a>      | Unknown             | Heterozygous | Unverified | Substitution - coding silent |
| <a href="#">HOXD13</a>  | <a href="#">ENST00000249505</a> | Yes         | p.P260P     | <a href="#">c.780G&gt;A</a>     | Unknown             | Heterozygous | Unverified | Substitution - coding silent |
| <a href="#">KRAS</a>    | <a href="#">ENST00000311936</a> | Yes         | p.G13D      | <a href="#">c.38G&gt;A</a>      | Confirmed Somatic   | Heterozygous | Verified   | Substitution - Missense      |
| <a href="#">NFI</a>     | <a href="#">ENST00000358273</a> | Yes         | p.T467fs*3  | <a href="#">c.1398_1399insC</a> | Unknown             | Heterozygous | Unverified | Insertion - Frameshift       |
| <a href="#">NF2</a>     | <a href="#">ENST00000338641</a> | Yes         | p.E231*     | <a href="#">c.691G&gt;T</a>     | Confirmed Somatic   | Homozygous   | Verified   | Substitution - Nonsense      |
| <a href="#">PBRM1</a>   | <a href="#">ENST00000337303</a> | Yes         | p.I228V     | <a href="#">c.682A&gt;G</a>     | Previously Reported | Heterozygous | Unverified | Substitution - Missense      |
| <a href="#">PCSK7</a>   | <a href="#">ENST00000320934</a> | Yes         | p.P52R      | <a href="#">c.155C&gt;G</a>     | Previously Reported | Heterozygous | Unverified | Substitution - Missense      |
| <a href="#">PDGFRA</a>  | <a href="#">ENST00000257290</a> | Yes         | p.Y172F     | <a href="#">c.515A&gt;T</a>     | Previously Reported | Heterozygous | Unverified | Substitution - Missense      |
| <a href="#">PER1</a>    | <a href="#">ENST00000317276</a> | Yes         | p.E189D     | <a href="#">c.567G&gt;T</a>     | Unknown             | Homozygous   | Unverified | Substitution - Missense      |
| <a href="#">SLC45A3</a> | <a href="#">ENST00000367145</a> | Yes         | p.R251W     | <a href="#">c.751C&gt;T</a>     | Unknown             | Heterozygous | Unverified | Substitution - Missense      |
| <a href="#">TCEA1</a>   | <a href="#">ENST00000360389</a> | Yes         | p.?         | <a href="#">c.126+7A&gt;T</a>   | Unknown             | Heterozygous | Unverified | Unknown                      |
| <a href="#">TP53</a>    | <a href="#">ENST00000269305</a> | Yes         | p.R280K     | <a href="#">c.839G&gt;A</a>     | Confirmed Somatic   | Heterozygous | Verified   | Substitution - Missense      |

Showing 1 to 22 of 22 entries [First](#) [Previous](#) [1](#) [Next](#) [Last](#)



Circos Genome Browser Overview **Mutations** Fusions Mutation Spectrum Non-Mutant Genes Breakpoints  
 Non-Coding mutation CNV & Expr Methylation Studies References

Show 10 entries Search: Export: CSV T

| Gene                   | Transcript                      | Census Gene | AA Mutation              | CDS Mutation                  | Somatic status    | Zygoty       | Validated  | Type                    |
|------------------------|---------------------------------|-------------|--------------------------|-------------------------------|-------------------|--------------|------------|-------------------------|
| <a href="#">ALK</a>    | <a href="#">ENST00000389048</a> | Yes         | <a href="#">p.R69Q</a>   | <a href="#">c.206G&gt;A</a>   | Confirmed Somatic | Heterozygous | Unverified | Substitution - Missense |
| <a href="#">ARID1A</a> | <a href="#">ENST00000324856</a> | Yes         | <a href="#">p.S1707G</a> | <a href="#">c.5119A&gt;G</a>  | Confirmed Somatic | Heterozygous | Unverified | Substitution - Missense |
| <a href="#">ATR</a>    | <a href="#">NM_001184</a>       | Yes         | <a href="#">p.S601F</a>  | <a href="#">c.1802C&gt;T</a>  | Confirmed Somatic | Heterozygous | Unverified | Substitution - Missense |
| <a href="#">BRAF</a>   | <a href="#">ENST00000288602</a> | Yes         | <a href="#">p.V600E</a>  | <a href="#">c.1799T&gt;A</a>  | Confirmed Somatic | Heterozygous | Unverified | Substitution - Missense |
| <a href="#">BRD3</a>   | <a href="#">ENST00000303407</a> | Yes         | <a href="#">p.S609F</a>  | <a href="#">c.1826C&gt;T</a>  | Confirmed Somatic | Heterozygous | Unverified | Substitution - Missense |
| <a href="#">CAMTA1</a> | <a href="#">ENST00000303635</a> | Yes         | <a href="#">p.E205K</a>  | <a href="#">c.613G&gt;A</a>   | Confirmed Somatic | Heterozygous | Unverified | Substitution - Missense |
| <a href="#">CDH1</a>   | <a href="#">ENST00000261769</a> | Yes         | <a href="#">p.Y190H</a>  | <a href="#">c.568T&gt;C</a>   | Confirmed Somatic | Heterozygous | Unverified | Substitution - Missense |
| <a href="#">CDKN2A</a> | <a href="#">ENST00000304494</a> | Yes         | <a href="#">p.?</a>      | <a href="#">c.150+2T&gt;C</a> | Confirmed Somatic | Heterozygous | Unverified | Unknown                 |
| <a href="#">COL1A1</a> | <a href="#">ENST00000225964</a> | Yes         | <a href="#">p.R312C</a>  | <a href="#">c.934C&gt;T</a>   | Confirmed Somatic | Homozygous   | Unverified | Substitution - Missense |
| <a href="#">COL2A1</a> | <a href="#">ENST00000337299</a> | Yes         | <a href="#">p.R989C</a>  | <a href="#">c.2965C&gt;T</a>  | Confirmed Somatic | Heterozygous | Unverified | Substitution - Missense |
| <a href="#">DICER1</a> | <a href="#">ENST00000343455</a> | Yes         | <a href="#">p.M1825I</a> | <a href="#">c.5475G&gt;A</a>  | Confirmed Somatic | Heterozygous | Unverified | Substitution - Missense |
| <a href="#">EBF1</a>   | <a href="#">ENST00000313708</a> | Yes         | <a href="#">p.G107R</a>  | <a href="#">c.319G&gt;A</a>   | Confirmed Somatic | Heterozygous | Unverified | Substitution - Missense |
| <a href="#">ERC1</a>   | <a href="#">ENST00000397203</a> | Yes         | <a href="#">p.S392F</a>  | <a href="#">c.1175C&gt;T</a>  | Confirmed Somatic | Heterozygous | Unverified | Substitution - Missense |
| <a href="#">KMT2C</a>  | <a href="#">ENST00000262189</a> | Yes         | <a href="#">p.E4319K</a> | <a href="#">c.12955G&gt;A</a> | Confirmed Somatic | Heterozygous | Unverified | Substitution - Missense |
| <a href="#">PTPRK</a>  | <a href="#">ENST00000368226</a> | Yes         | <a href="#">p.H1045Y</a> | <a href="#">c.3133C&gt;T</a>  | Confirmed Somatic | Heterozygous | Unverified | Substitution - Missense |
| <a href="#">RHOH</a>   | <a href="#">ENST00000505618</a> | Yes         | <a href="#">p.R157W</a>  | <a href="#">c.469C&gt;T</a>   | Confirmed Somatic | Homozygous   | Unverified | Substitution - Missense |
| <a href="#">SEPT6</a>  | <a href="#">ENST00000343984</a> | Yes         | <a href="#">p.P181S</a>  | <a href="#">c.541C&gt;T</a>   | Confirmed Somatic | Heterozygous | Unverified | Substitution - Missense |
| <a href="#">SPEN</a>   | <a href="#">ENST00000375759</a> | Yes         | <a href="#">p.P3345S</a> | <a href="#">c.10033C&gt;T</a> | Confirmed Somatic | Heterozygous | Unverified | Substitution - Missense |
| <a href="#">SPEN</a>   | <a href="#">ENST00000375759</a> | Yes         | <a href="#">p.R423C</a>  | <a href="#">c.1267C&gt;T</a>  | Confirmed Somatic | Heterozygous | Unverified | Substitution - Missense |
| <a href="#">TP53</a>   | <a href="#">ENST00000269305</a> | Yes         | <a href="#">p.G266E</a>  | <a href="#">c.797G&gt;A</a>   | Confirmed Somatic | Heterozygous | Unverified | Substitution - Missense |

Showing 1 to 20 of 20 entries First Previous 1 Next Last
