# Supplementary material for: TGF-β reduces DNA ds-break repair mechanisms to heighten genetic diversity and adaptability of CD44+/CD24− cancer cells
Source: eLife journal article supplement (doi:10.7554/elife.21615), 2017-01-16
Supplement: supp [file elife_poa_e21615_Figure_1_figure_Supplement_1.pdf › elife_poa_e21615_Figure_1_figure_Supplement_1.pdf]

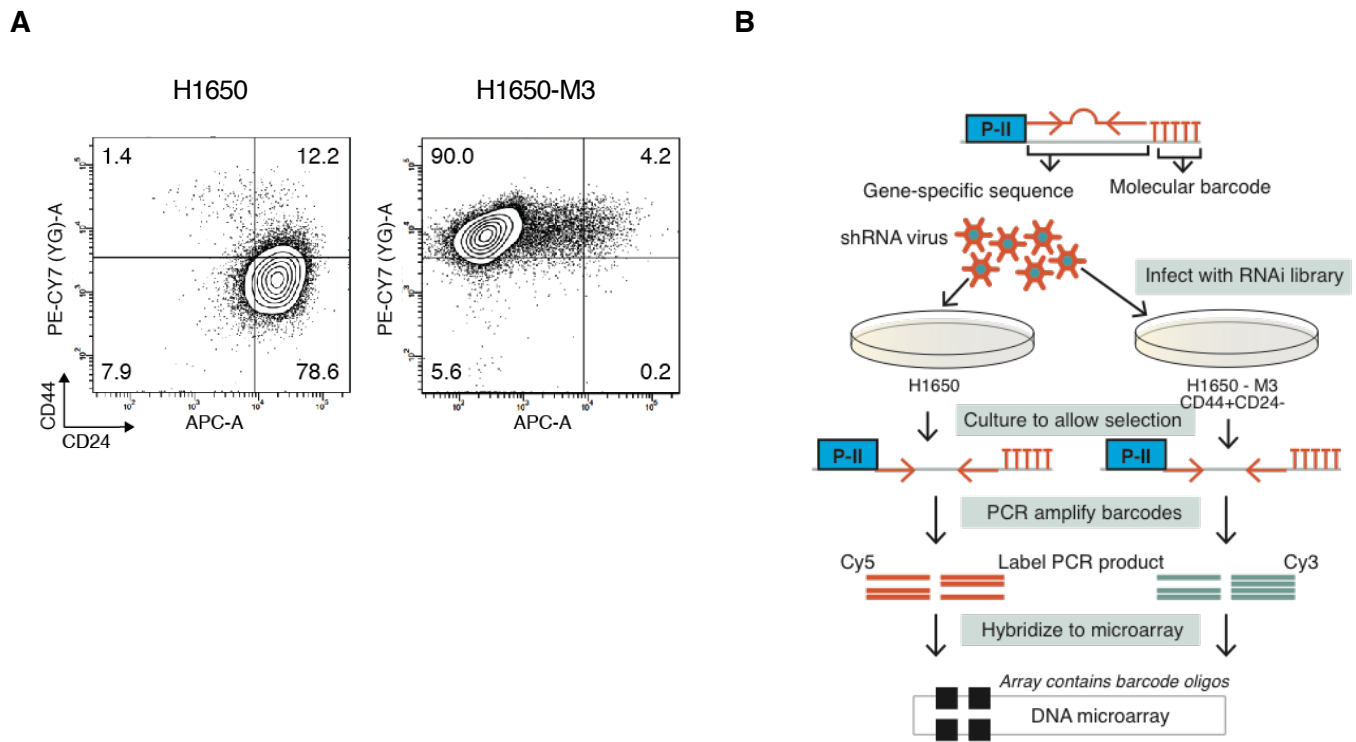

**Figure 1—figure supplement 1.**

**Forward genetic screen performed in H1650 and H1650-M3 cell lines.**

**A.** FACS analysis of H1650 and H1650-M3 stained with antibodies against cell surface markers CD44 and CD24.

**B.** A schematic of the RNAi-based, forward genetic screen.
