# Supplementary material for: TGF-β reduces DNA ds-break repair mechanisms to heighten genetic diversity and adaptability of CD44+/CD24− cancer cells
Source: eLife journal article supplement (doi:10.7554/elife.21615), 2017-01-16
Supplement: supp [file elife_poa_e21615_Figure_1_figure_Supplement_4.pdf › elife_poa_e21615_Figure_1_figure_Supplement_4.pdf]

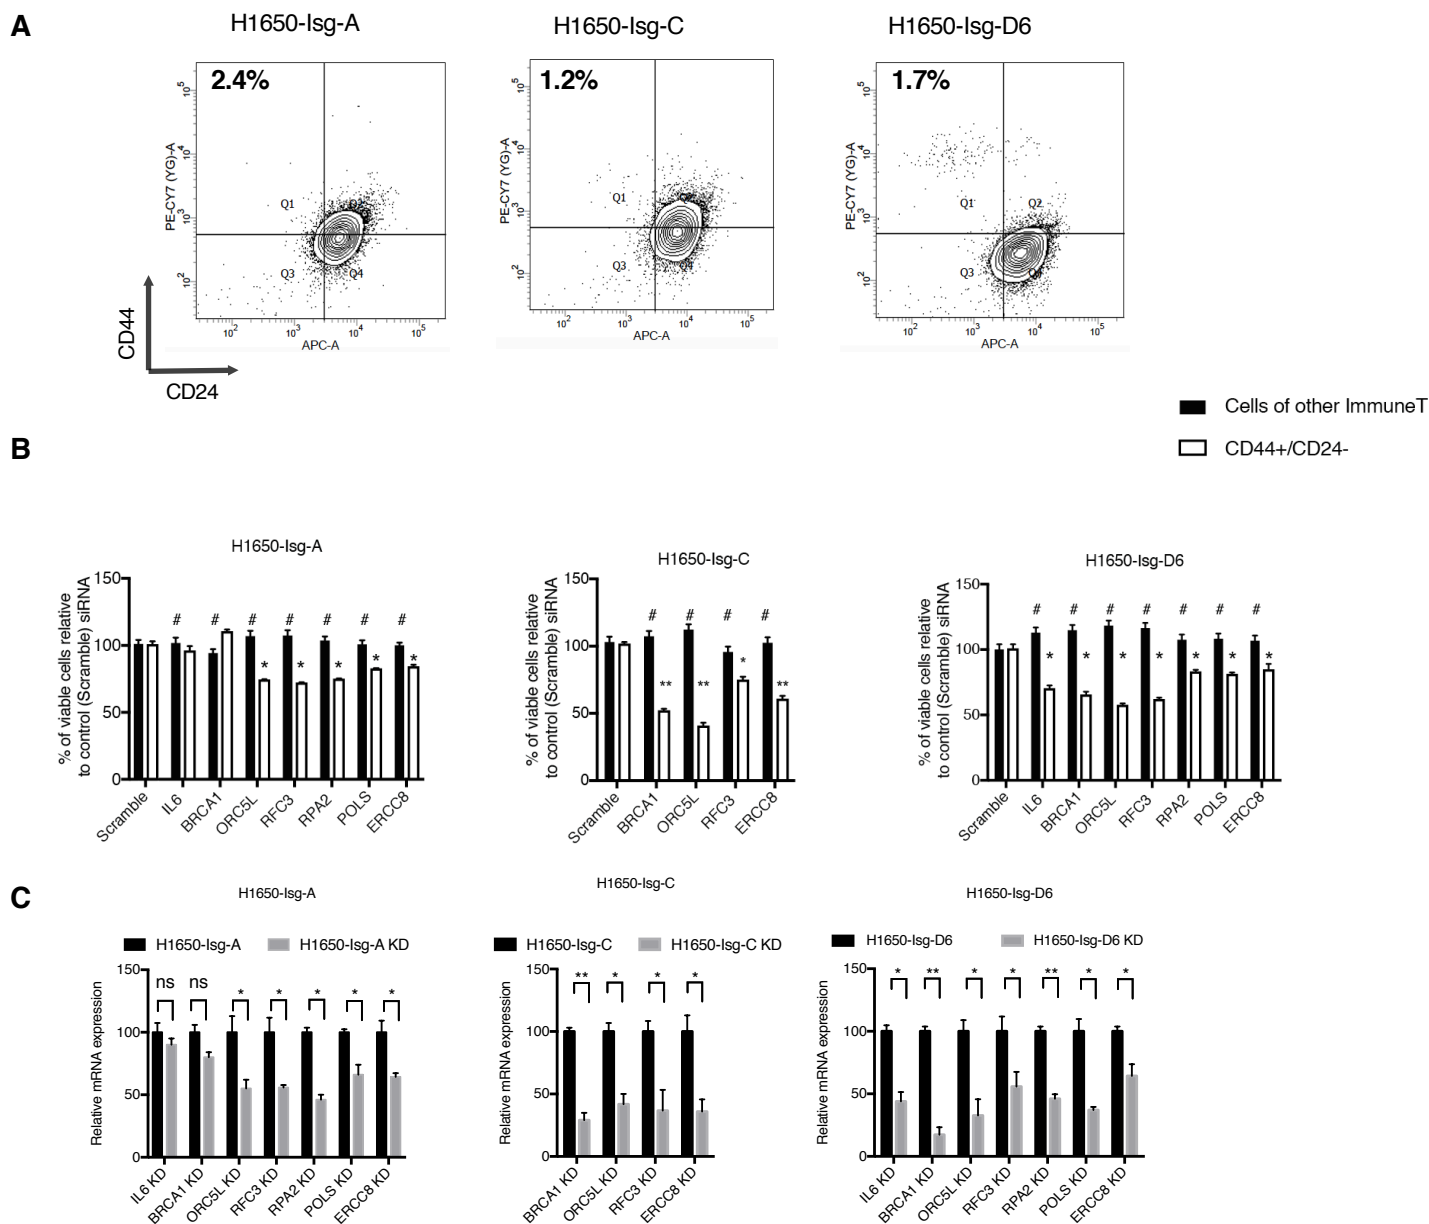

**Figure 1—figure supplement 4.**

**Validation of shRNA screen hits in H1650 derived isogenic clones, FACS sorted based on surface expression of CD44 and CD24.**

**A.** FACS profile of H1650 derived isogenic cell lines stained with CD44 and CD24 antibodies. The numbers in bold represent the % of cells that are CD44+/CD24-.

**B.** The charts represent the percentage of viable CD44+/CD24- cells and cells of other immunotypes upon transfection with the indicated siRNA oligonucleotides relative to control (scramble siRNA). Each bar represents mean  $\pm$  SD of 3 technical replicates from 2 independent experiments. 10,000 cells were analyzed by FACS for each replicate of each sample.

**C.** Efficiency of knock down upon transfection with the indicated siRNA oligonucleotides and compared to scramble siRNA transfected control cells. Cells were collected 3 days post transfection and analyzed for expression of the indicated mRNA. Each bar represents mean  $\pm$  SD of 3 replicates.

p-value \* $<0.05$ , \*\* $<0.005$ , \*\*\* $<0.0005$ , unpaired t-test. Non significant differences are shown by the symbol ‘#’ or ‘ns’.
