# Supplementary material for: TGF-β reduces DNA ds-break repair mechanisms to heighten genetic diversity and adaptability of CD44+/CD24− cancer cells
Source: eLife journal article supplement (doi:10.7554/elife.21615), 2017-01-16
Supplement: supp [file elife_poa_e21615_Figure_1_figure_Supplement_5.pdf › elife_poa_e21615_Figure_1_figure_Supplement_5.pdf]

**A**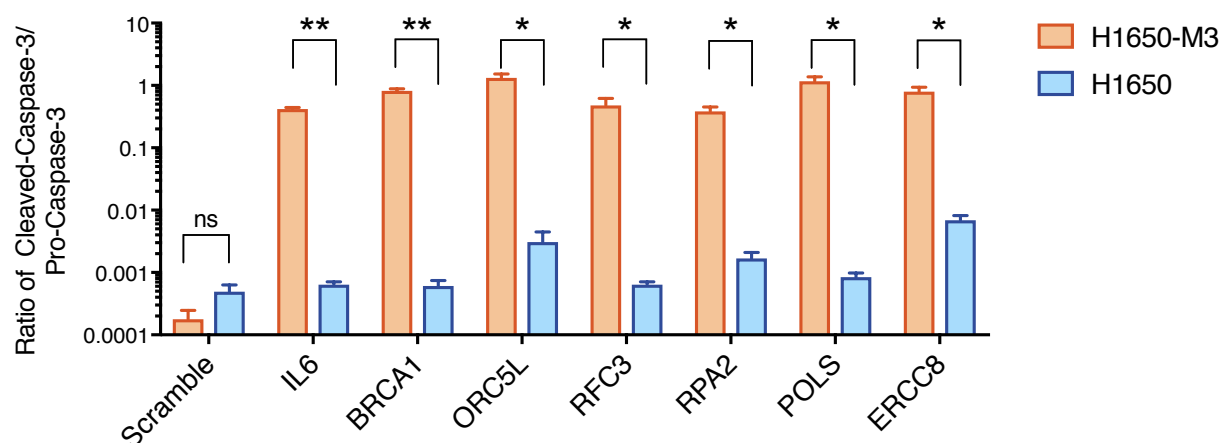

**Figure 1—figure supplement 5.**

**Quantification of apoptosis mediated increase in lethality in H1650-M3 and H1650**

**A.** The chart depicts quantification of relative amounts of Cleaved-Caspase-3 between H1650-M3 and H1650 from the immunoblots indicated in Figure 1F. Levels of intensity of each band were quantified using imageJ32 software and is represented as a ratio to Pro-Caspase-3. The data represents mean  $\pm$  SD from 2 independent experiments. p-value  $<0.05$ ,  $**<0.005$ , unpaired t-test.
