# Supplementary material for: TGF-β reduces DNA ds-break repair mechanisms to heighten genetic diversity and adaptability of CD44+/CD24− cancer cells
Source: eLife journal article supplement (doi:10.7554/elife.21615), 2017-01-16
Supplement: supp [file elife_poa_e21615_Figure_1_figure_Supplement_6.pdf › elife_poa_e21615_Figure_1_figure_Supplement_6.pdf]

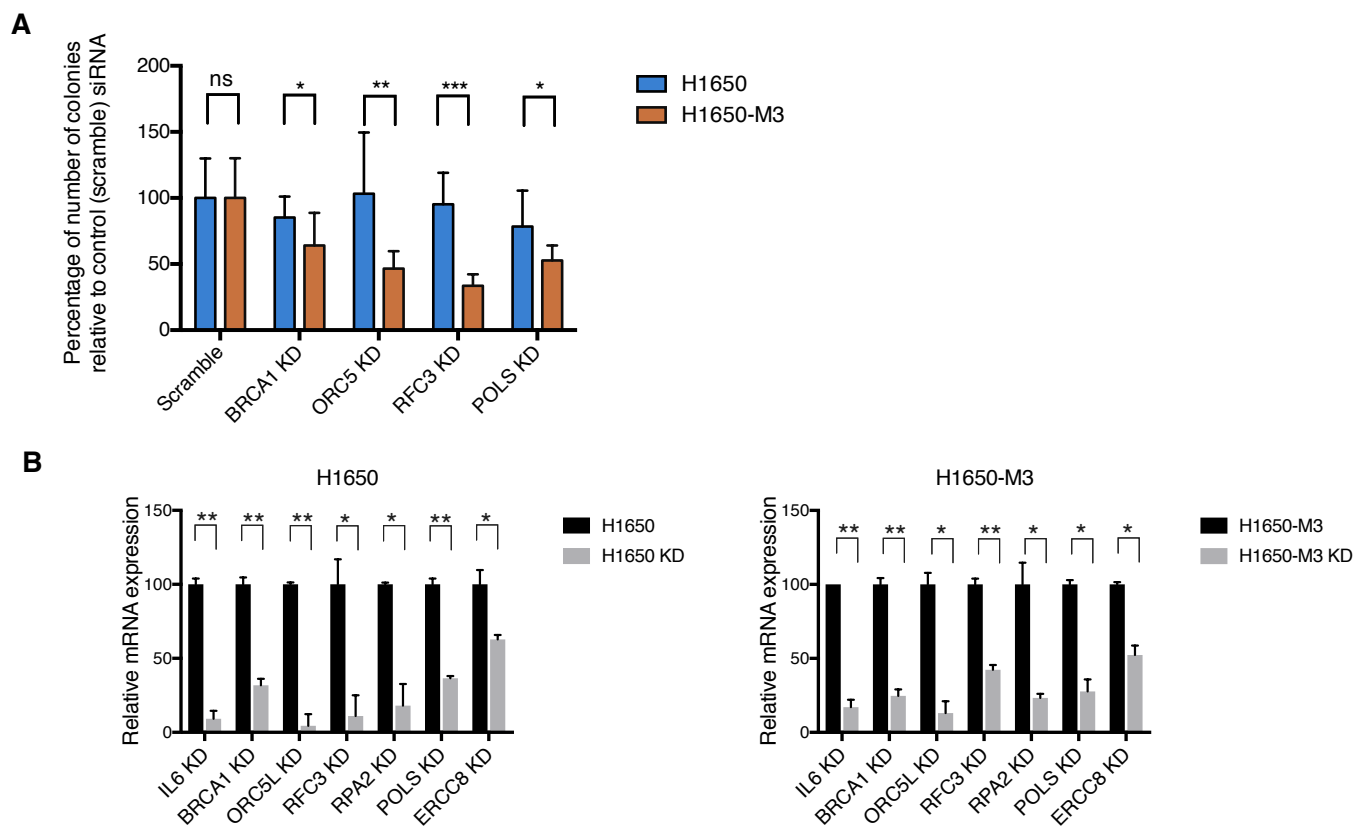

**Figure 1—figure supplement 6.**

**Validation of shRNA screen hits in H1650 and H1650-M3 cells by Clonogenic assay technique.**

**A.** Clonogenic assay performed on H1650 and H1650-M3 to validate siRNA screen hits BRCA1, ORC5L, RFC3, POLS. The charts represent the percentage of viable cells after 15 days upon transfection with the indicated siRNA oligonucleotides compared to scramble siRNA transfected control cells. Each bar represents mean  $\pm$  SD of data collected from 10 fields from 3 different 6-wells (n=30).

**B.** Knock down efficiency for clonogenic assay upon transfection with the indicated siRNA oligonucleotides. Samples were collected 3 days post-transfection and analyzed by immunoblot analysis with antibodies against Total caspase 3, alpha-tubulin and Cleaved-caspase 3. Each bar represents mean  $\pm$  SD of 3 replicates.

p-value \* $<0.05$ , \*\* $<0.005$ , \*\*\* $<0.0005$ , unpaired t-test. Non significant differences are shown by the symbol ‘#’ or ‘ns’.
