# Supplementary material for: TGF-β reduces DNA ds-break repair mechanisms to heighten genetic diversity and adaptability of CD44+/CD24− cancer cells
Source: eLife journal article supplement (doi:10.7554/elife.21615), 2017-01-16
Supplement: supp [file elife_poa_e21615_Figure_2_figure_Supplement_1.pdf › elife_poa_e21615_Figure_2_figure_Supplement_1.pdf]

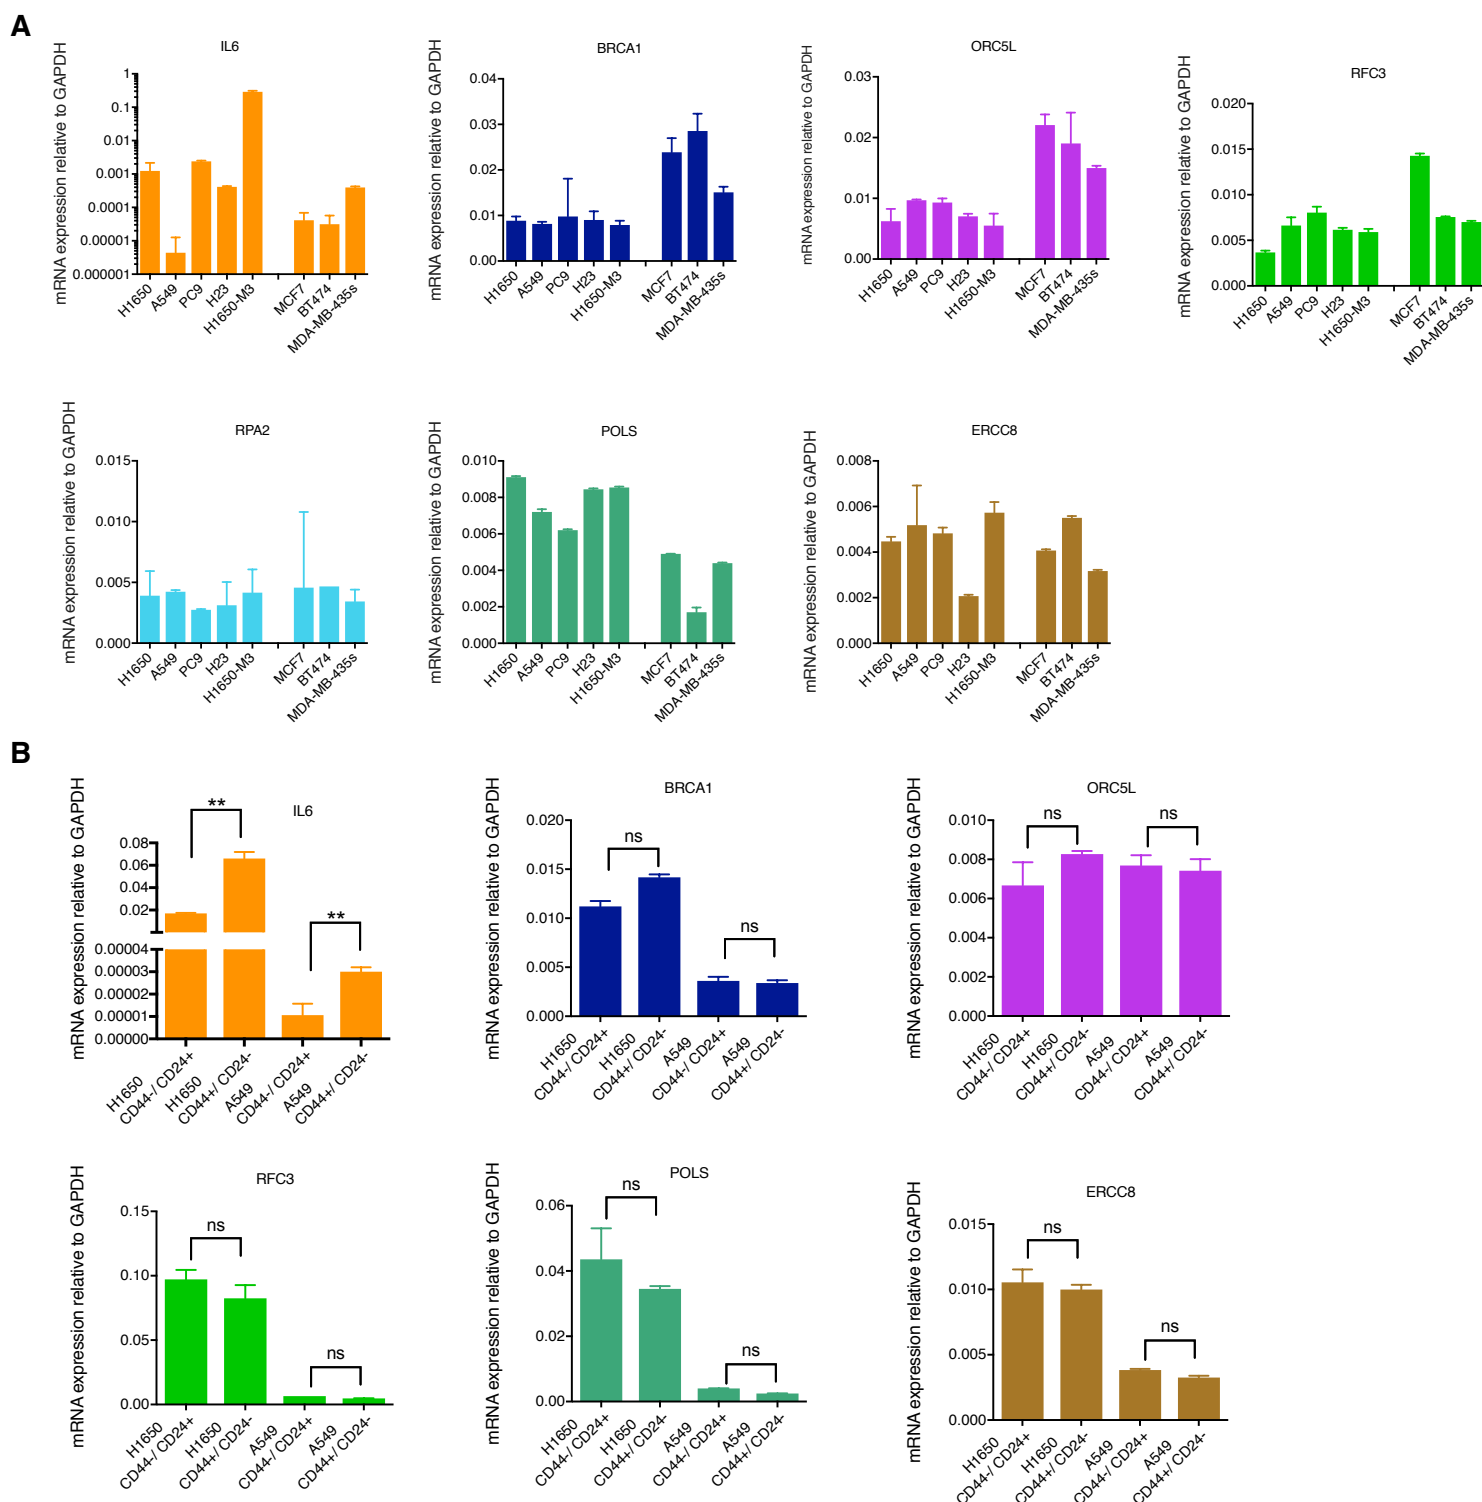

**Figure 2—figure supplement 1.**

**mRNA expression analysis of the shRNA screen hits in tumor-derived cell lines and FACS sorted cells based on surface expression of CD44 and CD24.**

**A.** mRNA expression analysis (SYBR-green-based RT-qPCR) of BRCA1, ORC5L, RFC3, RPA2, POLS and ERCC8 in tumor derived cell lines. The data represents mean  $\pm$  SD of 3 replicates from 2 independent experiments.

**B.** mRNA expression analysis (SYBR-green-based RT-qPCR) of BRCA1, ORC5L, RFC3, RPA2, POLS and ERCC8 in H1650 and A549 FACS sorted cells based on surface expression of CD44 and CD24. Each bar represents mean  $\pm$  SD of 3 replicates from 2 independent experiments and represents mRNA expression of the indicated gene normalized to GAPDH expression of each cell line.

p-value \*\* < 0.005, unpaired t-test; ns= non-significant.
