# Supplementary material for: TGF-β reduces DNA ds-break repair mechanisms to heighten genetic diversity and adaptability of CD44+/CD24− cancer cells
Source: eLife journal article supplement (doi:10.7554/elife.21615), 2017-01-16
Supplement: supp [file elife_poa_e21615_Figure_2_figure_Supplement_2.pdf › elife_poa_e21615_Figure_2_figure_Supplement_2.pdf]

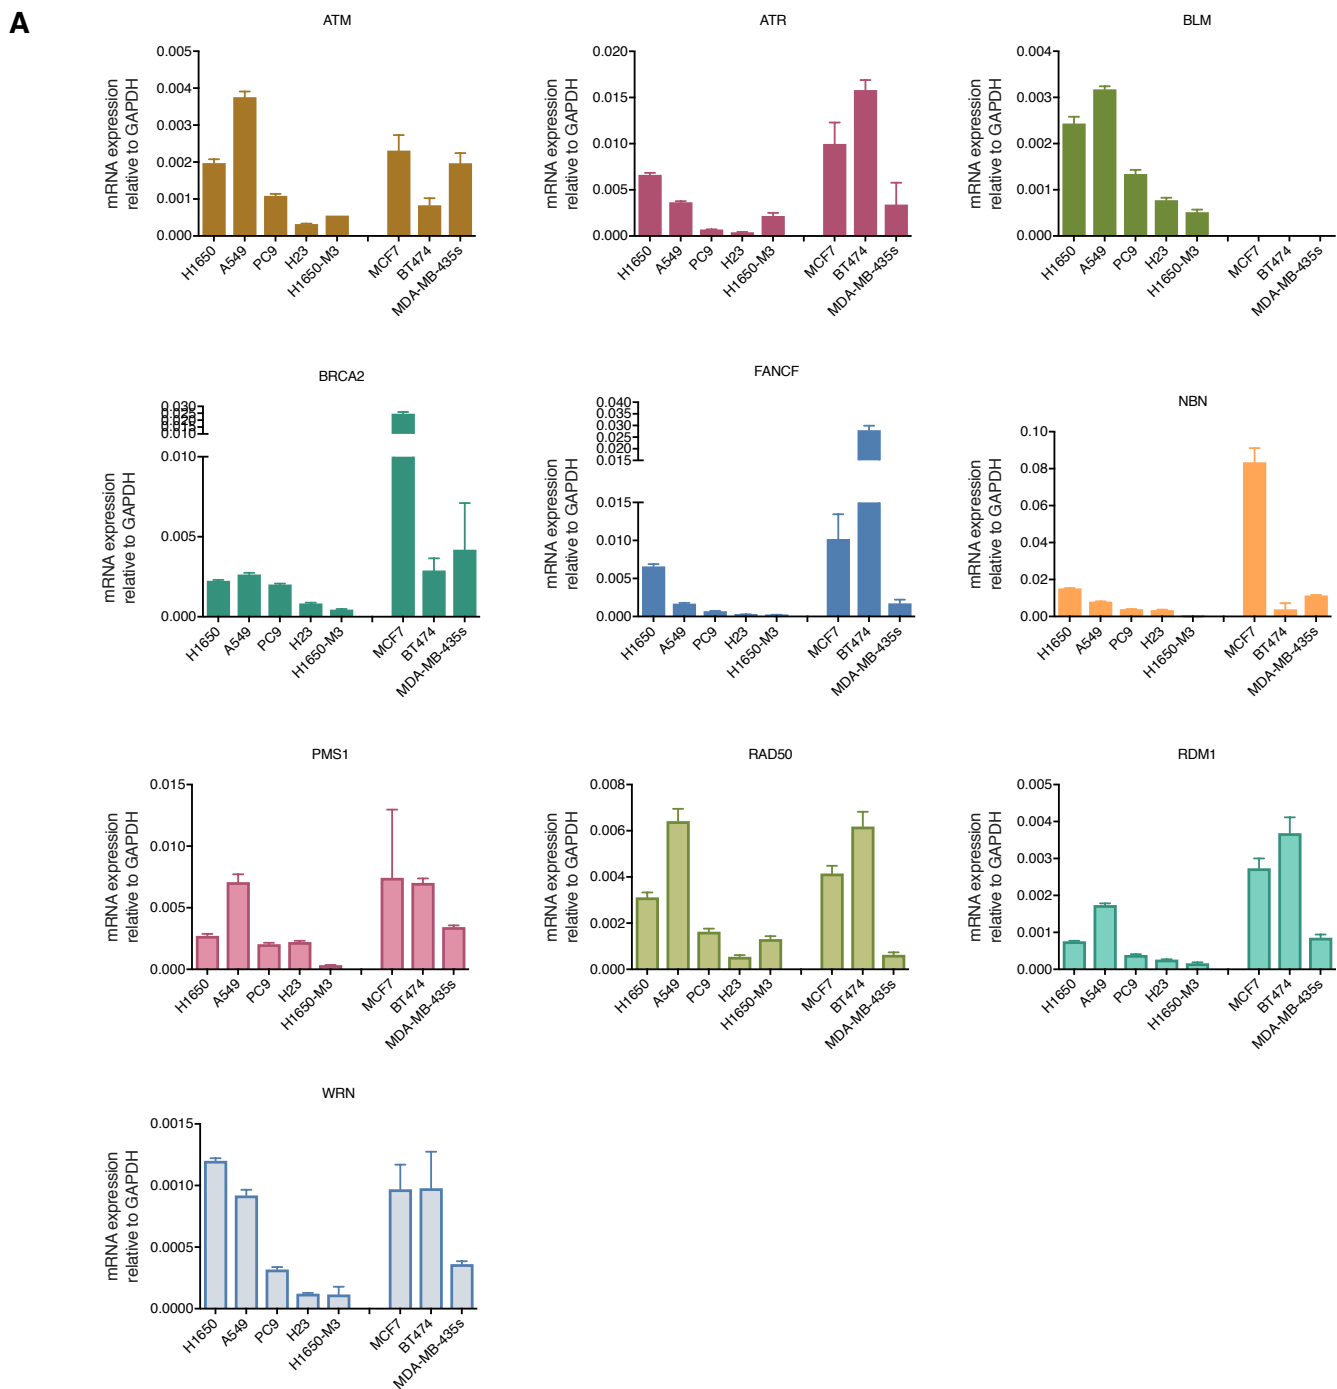

**Figure 2—figure supplement 2.**

**Differential mRNA expression of homology directed repair (HDR) genes in multiple tumor-derived cell lines.**

**A.** The chart represents mRNA expression analysis (SYBR-green-based RT-qPCR) of the indicated HDR genes we observed to be down-regulated in the H1650-M3 (CD44<sup>+</sup>/CD24<sup>-</sup>) cells across the indicated cell lines. The data represents mean  $\pm$  SD of 3 replicates from 2 independent experiments.
