# Supplementary material for: TGF-β reduces DNA ds-break repair mechanisms to heighten genetic diversity and adaptability of CD44+/CD24− cancer cells
Source: eLife journal article supplement (doi:10.7554/elife.21615), 2017-01-16
Supplement: supp [file elife_poa_e21615_Figure_2_figure_Supplement_3.pdf › elife_poa_e21615_Figure_2_figure_Supplement_3.pdf]

**A**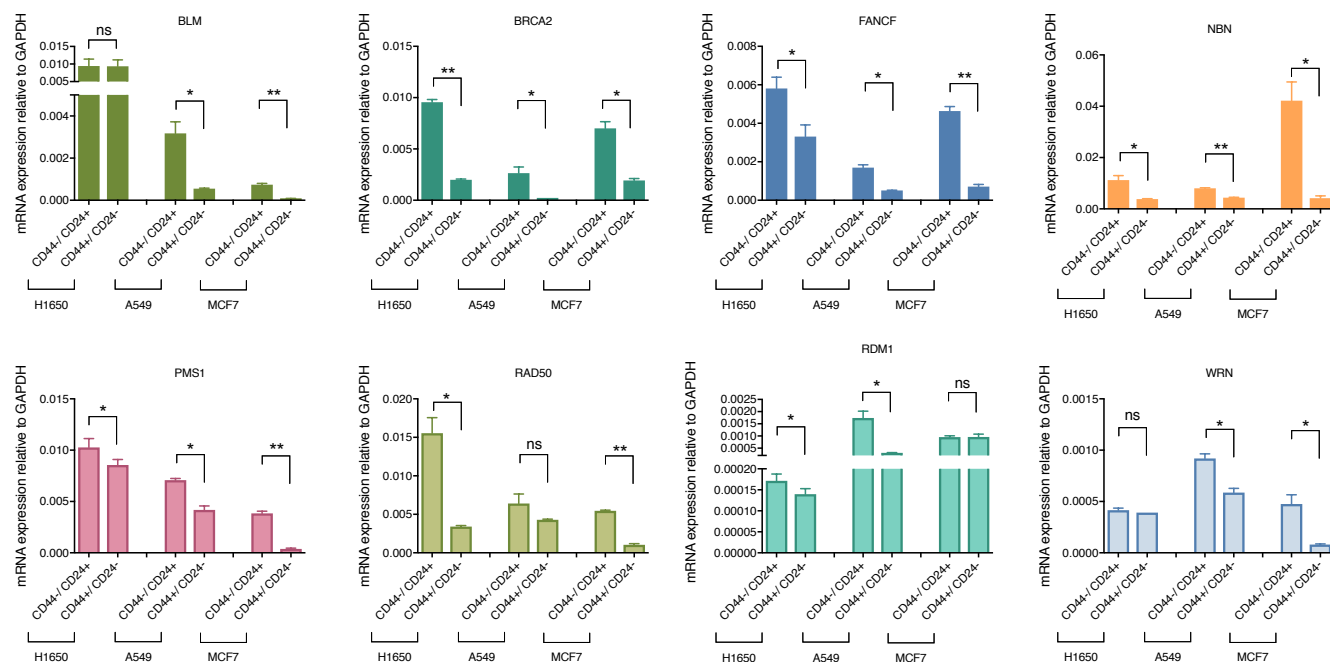**B**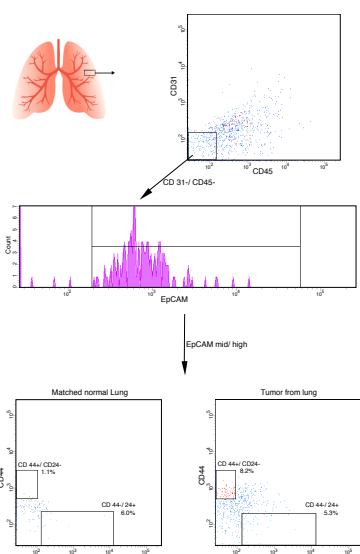**C**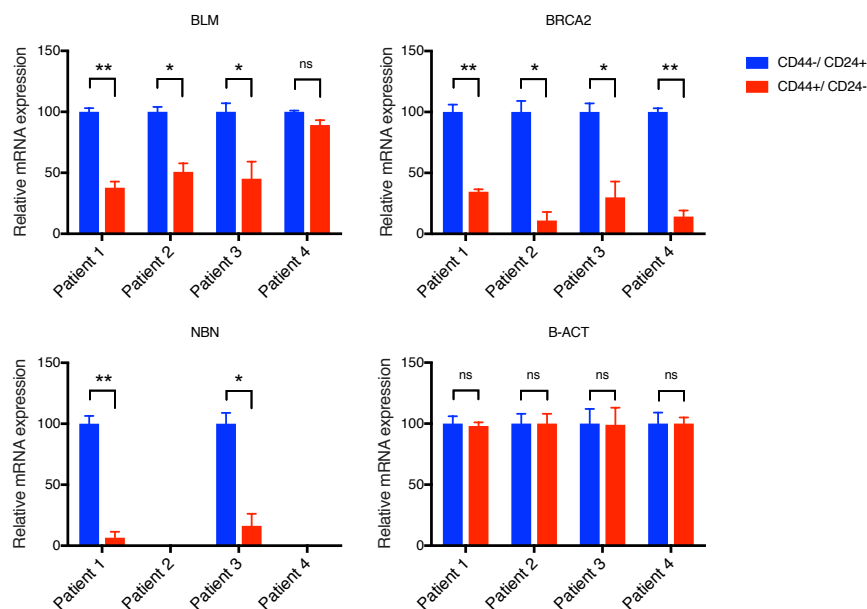

**Figure 2—figure supplement 3.**

**mRNA expression analysis of HDR genes in CD44-/CD24+ and CD44+/CD24- cells FACS sorted from cells lines and patient tumors.**

**A.** Comparative expression of the indicated HDR genes in FACS sorted CD44+/CD24- cells relative to CD44-/CD24+ cells from H1650, A549 and MCF7. mRNA expression was quantified by RT-qPCR. Each bar is the mean  $\pm$  SD of 3 replicates from 2 different experiments and represents mRNA expression of the indicated gene. p-value \* $<0.05$ , \*\* $<0.005$ , unpaired t-test.

**B.** Schematic of cell sorting from tumors. Tumor derived single cell suspension was stained with antibodies against CD45, CD31, EpCAM, CD44, and CD24. CD45-, CD31-, EpCAM+ cells were then FACS sorted according to the immune-types CD44+/CD24- and CD44-/CD24+.

**C.** Expression of BLM, BRCA2, NBN and B-ACT genes in FACS sorted CD44-/CD24+ and CD44+/CD24- cells from four NSCL tumor. B-ACT was used as a housekeeping control gene. Each bar represents mean  $\pm$  SD of 3 replicates. p-value \* $<0.05$ , \*\*\* $<0.0005$ , unpaired t-test.
