# Supplementary material for: TGF-β reduces DNA ds-break repair mechanisms to heighten genetic diversity and adaptability of CD44+/CD24− cancer cells
Source: eLife journal article supplement (doi:10.7554/elife.21615), 2017-01-16
Supplement: supp [file elife_poa_e21615_Figure_2_figure_Supplement_4.pdf › elife_poa_e21615_Figure_2_figure_Supplement_4.pdf]

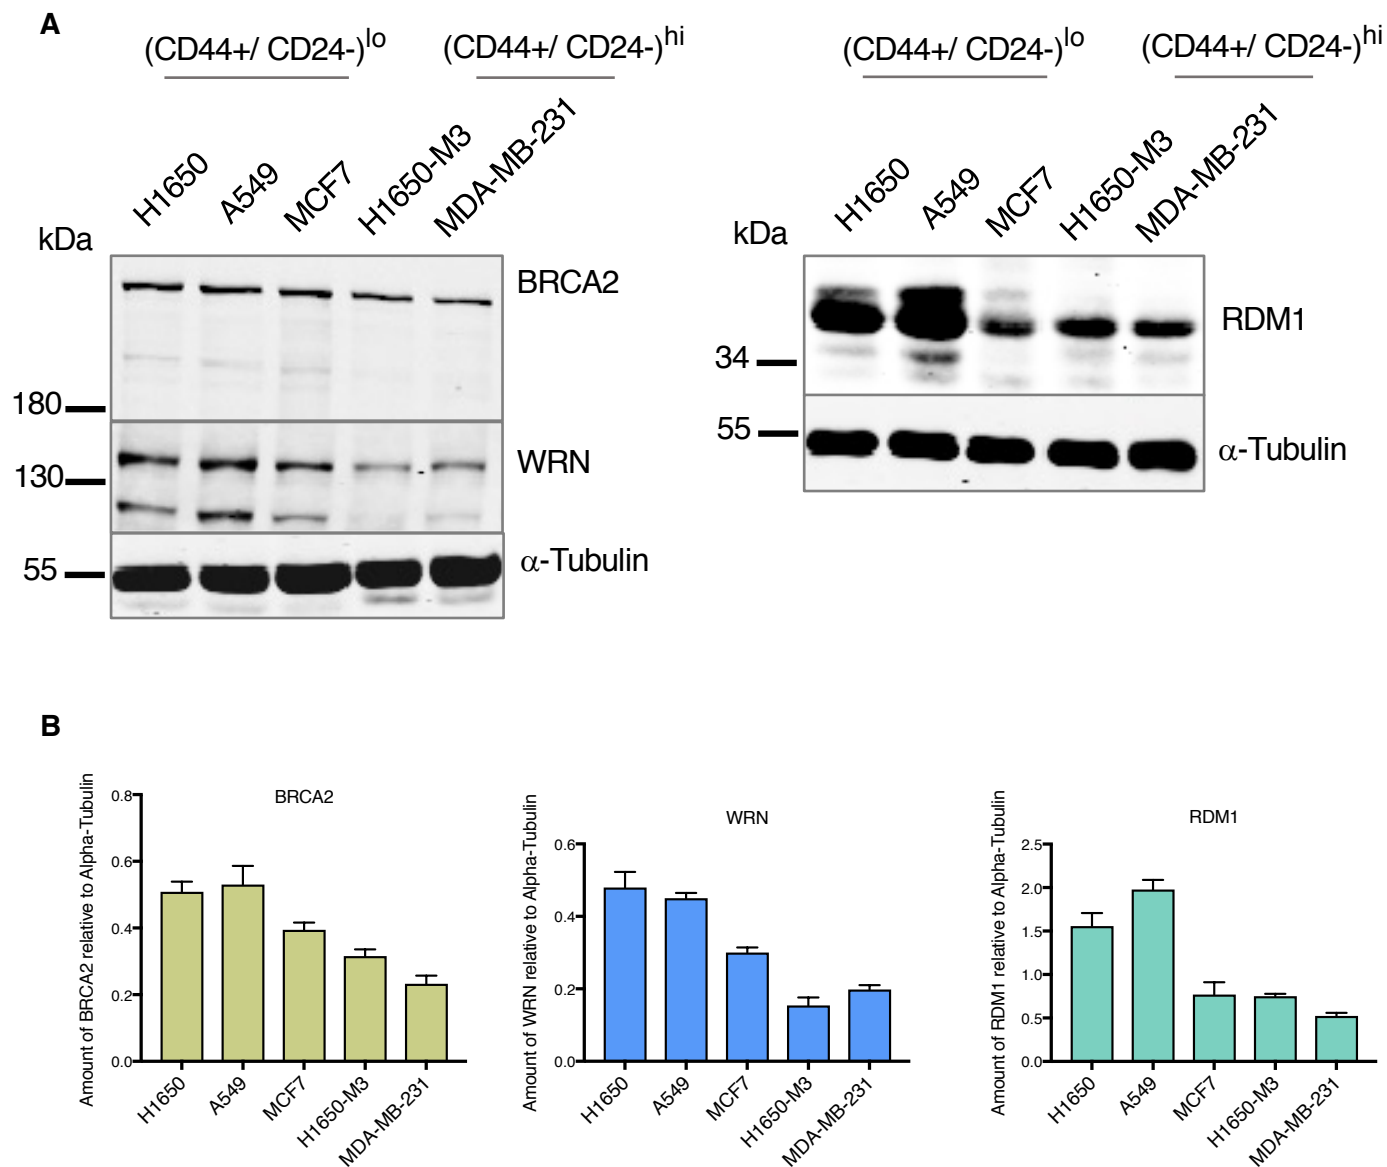

**Figure 2—figure supplement 4.**

**Differential expression of HDR genes in multiple tumor derived cell lines at protein level.**

**A.** Expression of BRCA2, WRN and RDM1 in multiple cancer derived cell lines characterized by different CD44 CD24 immune-types. Alpha-Tubulin is used as a loading control.

**B.** The charts depict quantification of relative amount of BRCA2, WRN and RDM1. Levels of intensity of each band were quantified using imajeJ32 software and is represented as a ratio to alpha-Tubulin. Each bar represents mean  $\pm$  SD from 2 independent experiments.
