# Supplementary material for: TGF-β reduces DNA ds-break repair mechanisms to heighten genetic diversity and adaptability of CD44+/CD24− cancer cells
Source: eLife journal article supplement (doi:10.7554/elife.21615), 2017-01-16
Supplement: supp [file elife_poa_e21615_Figure_2_figure_Supplement_5.pdf › elife_poa_e21615_Figure_2_figure_Supplement_5.pdf]

**A**

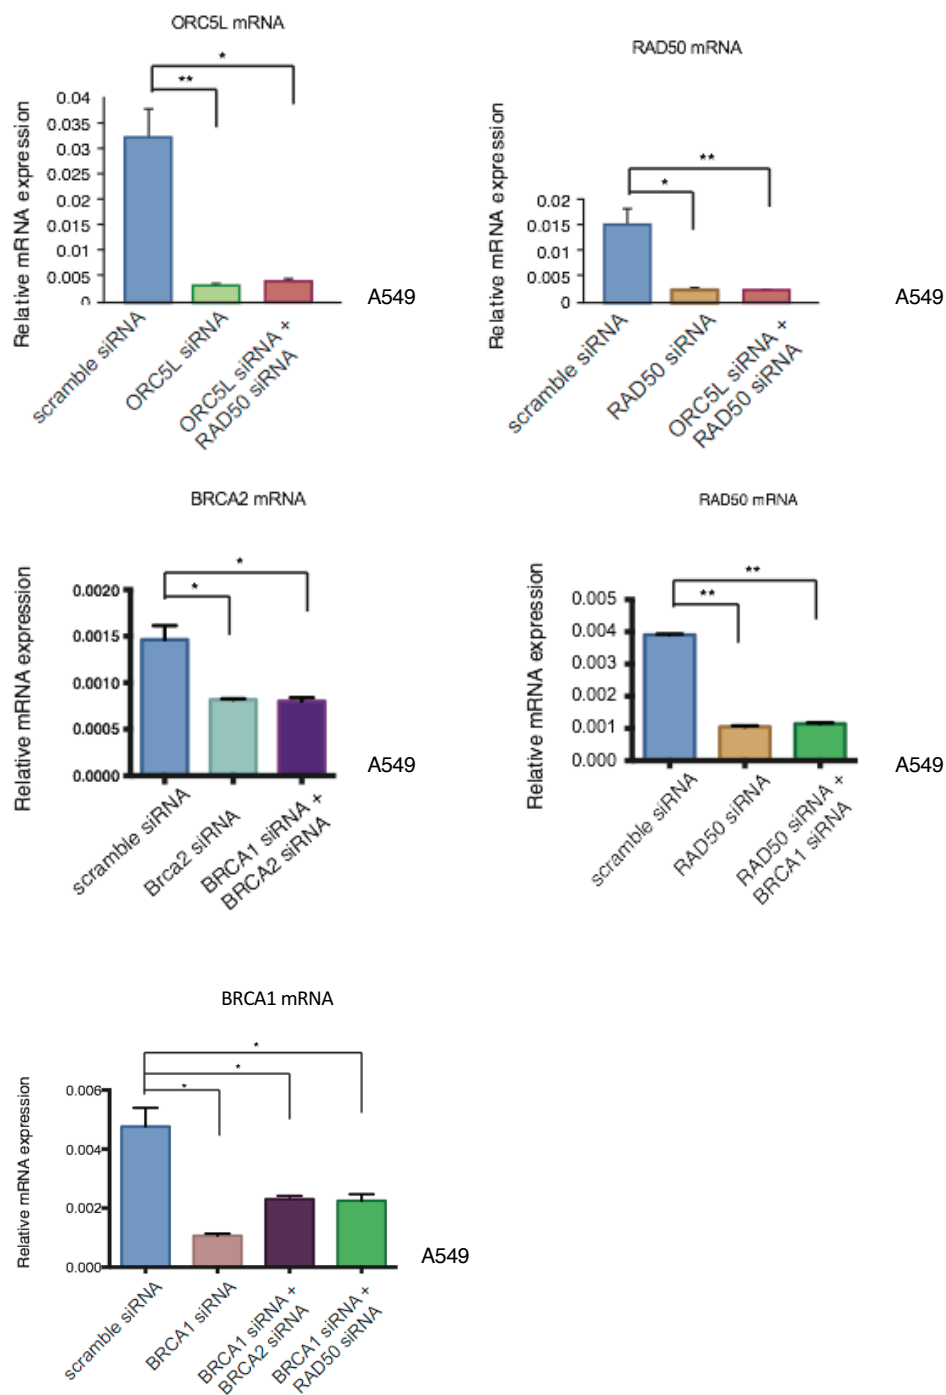

**Figure 2—figure supplement 5.**

**Knockdown efficiencies of the indicated siRNAs in A549 cells.**

**A.** Knock down efficiency upon transfection with the indicated siRNA oligonucleotides and compared to scramble siRNA transfected control cells. Cells were collected 3 days post transfection and analyzed for expression of the indicated mRNA. Each bar represents mean  $\pm$  SD of 3 replicates from 2 independent experiments and represents mRNA expression of the indicated gene normalized to GAPDH expression of each cell line. p-value  $* < 0.05$ ,  $** < 0.005$ , paired t-test.
