# Supplementary material for: TGF-β reduces DNA ds-break repair mechanisms to heighten genetic diversity and adaptability of CD44+/CD24− cancer cells
Source: eLife journal article supplement (doi:10.7554/elife.21615), 2017-01-16
Supplement: supp [file elife_poa_e21615_Figure_3_figure_Supplement_1.pdf › elife_poa_e21615_Figure_3_figure_Supplement_1.pdf]

**A**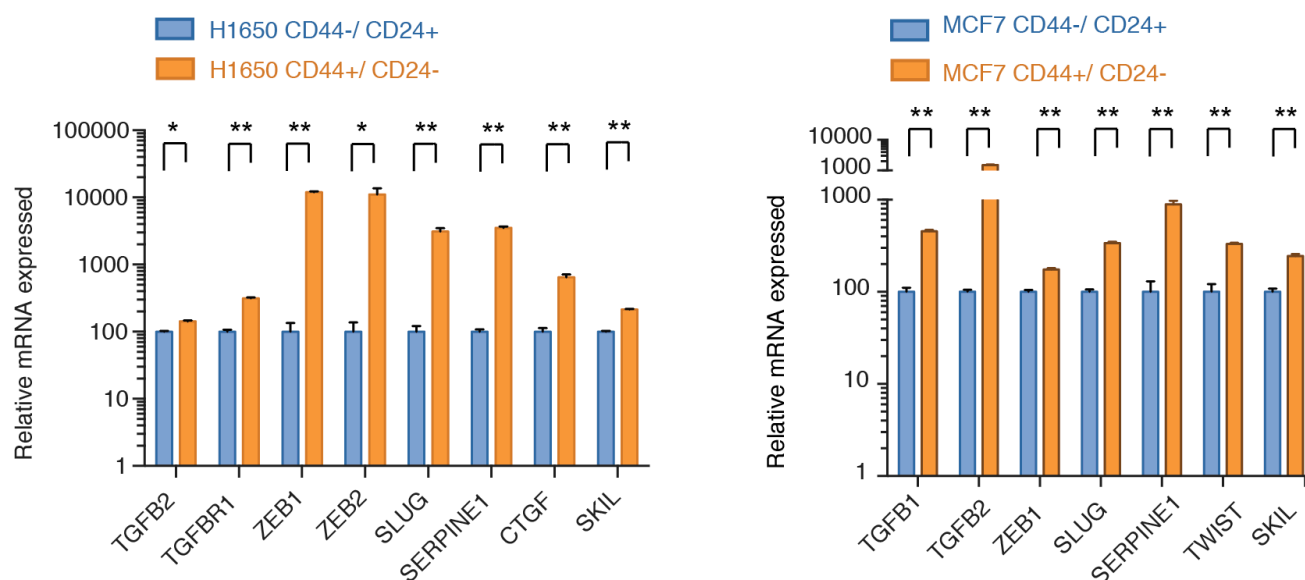

**Figure 3—figure supplement 1.**

**TGF-beta signaling is upregulated in FACS sorted CD44+/CD24- cells.**

- A. Expression of well known TGF-beta target genes in CD44+/CD24- cells relative to CD44-/CD24+ cells sorted from H1650 and MCF7. mRNA expression was quantified by SYBR-green-based RT-qPCR. Each bar represents mean  $\pm$  SD of 3 replicates from 2 independent experiments and represents mRNA expression of the indicated gene normalized to GAPDH expression of each cell line (n=6). p-value  $<0.05$ ,  $<0.005$  unpaired t-test.
