# Supplementary material for: TGF-β reduces DNA ds-break repair mechanisms to heighten genetic diversity and adaptability of CD44+/CD24− cancer cells
Source: eLife journal article supplement (doi:10.7554/elife.21615), 2017-01-16
Supplement: supp [file elife_poa_e21615_Figure_3_figure_Supplement_2.pdf › elife_poa_e21615_Figure_3_figure_Supplement_2.pdf]

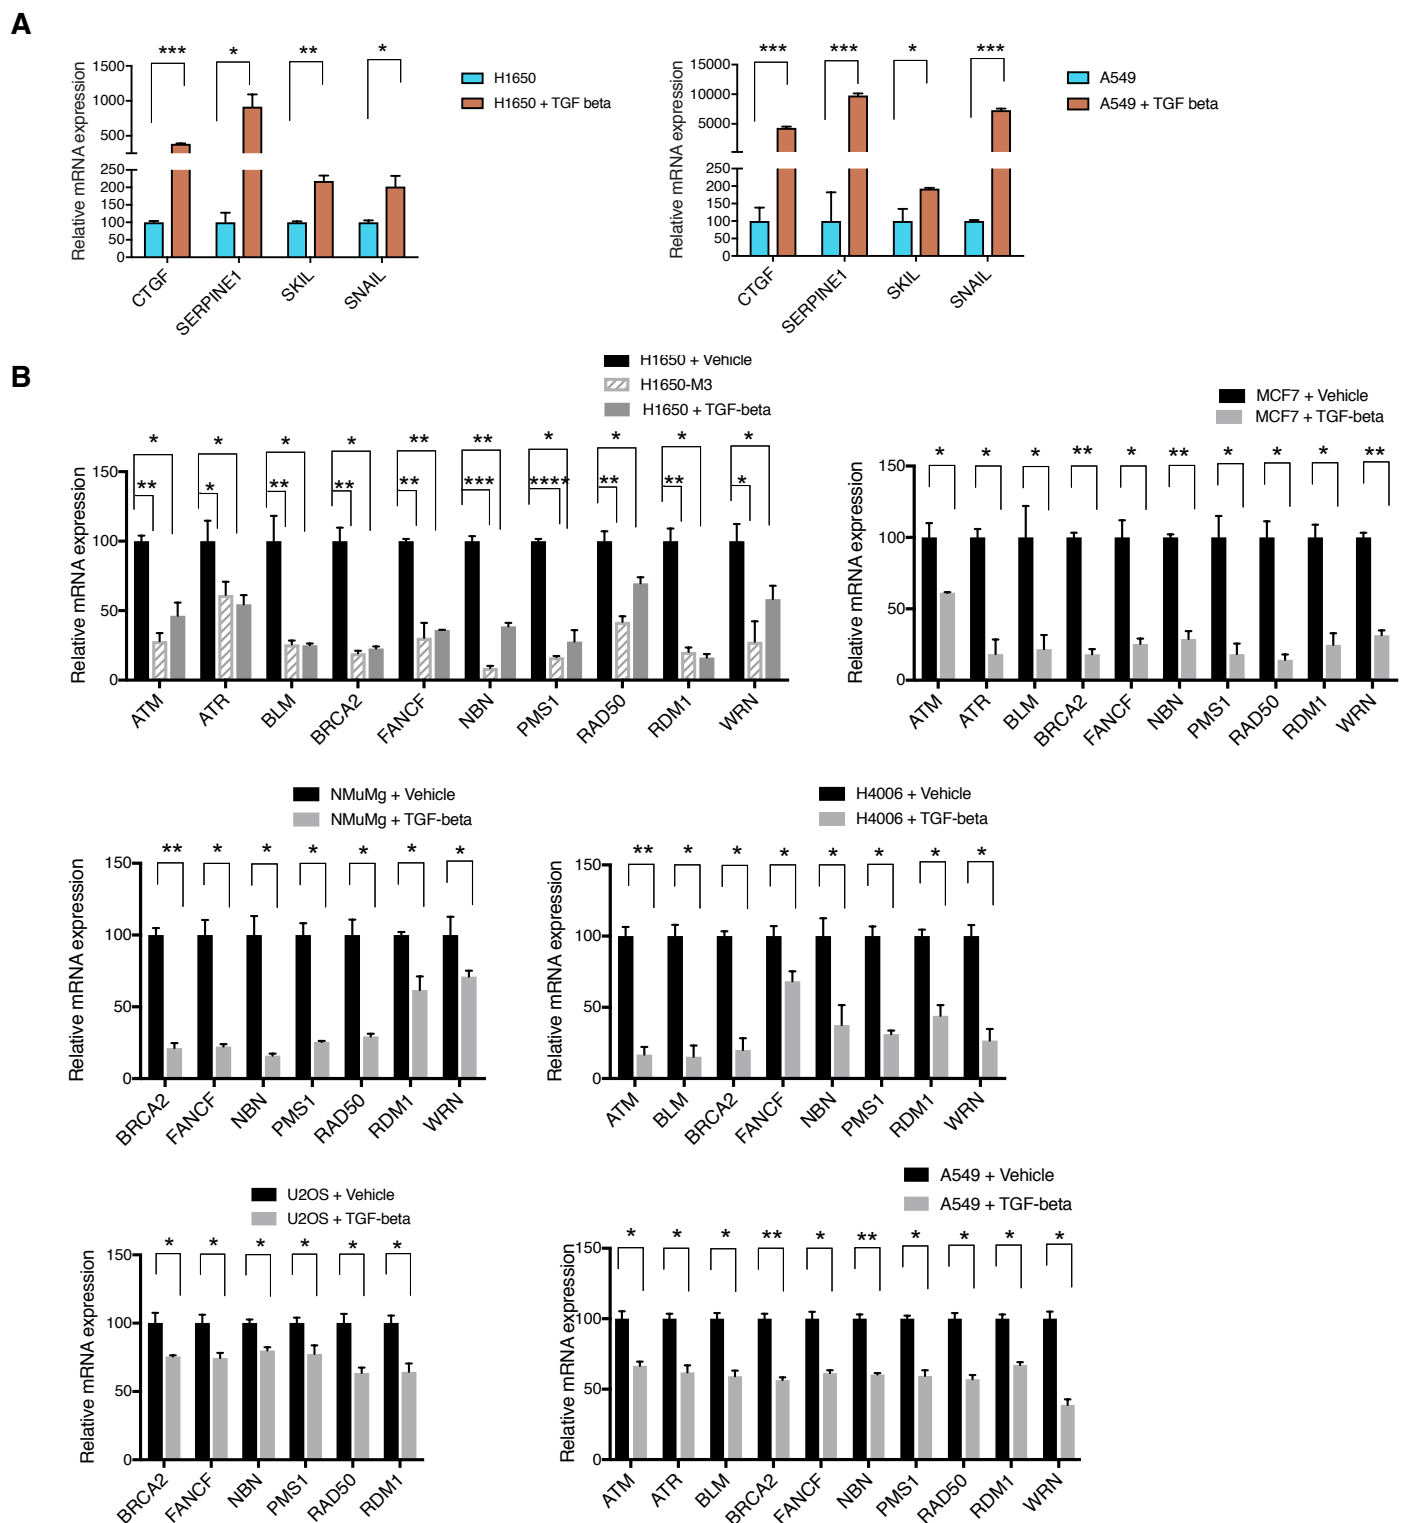

**Figure 3—figure supplement 2.**

**Active TGF-beta signaling control the expression of multiple HDR genes.**

**A.** TGF-beta signature target genes measured by SYBR-green-based RT-qPCR in H1650 and A549 upon treating the cells with TGF-beta for 9hrs. mRNA expression was quantified by RT-qPCR. Each bar represents mean  $\pm$  SD of 3 replicates from 3 independent experiments and represents mRNA expression of the indicated gene. p-value  $<0.05$ ,  $<0.005$   $<0.0005$ , paired t-test.

**B.** mRNA expression analysis of indicated HDR genes in TGF-beta treated cells relative to vehicle control in the indicated cell lines. mRNA expression was quantified by SYBR-green-based RT-qPCR. Each bar represents mean  $\pm$  SD of 3 replicates from 2 independent experiments (n=6), normalized to respective GAPDH mRNA expression. Cells were treated for 9 hours with TGF-beta (1ng/ml each of TGF-beta1 and TGF-beta2).

p-value  $<0.05$ ,  $<0.005$   $<0.0005$ , paired t-test.
