# Supplementary material for: TGF-β reduces DNA ds-break repair mechanisms to heighten genetic diversity and adaptability of CD44+/CD24− cancer cells
Source: eLife journal article supplement (doi:10.7554/elife.21615), 2017-01-16
Supplement: supp [file elife_poa_e21615_Figure_3_figure_Supplement_3.pdf › elife_poa_e21615_Figure_3_figure_Supplement_3.pdf]

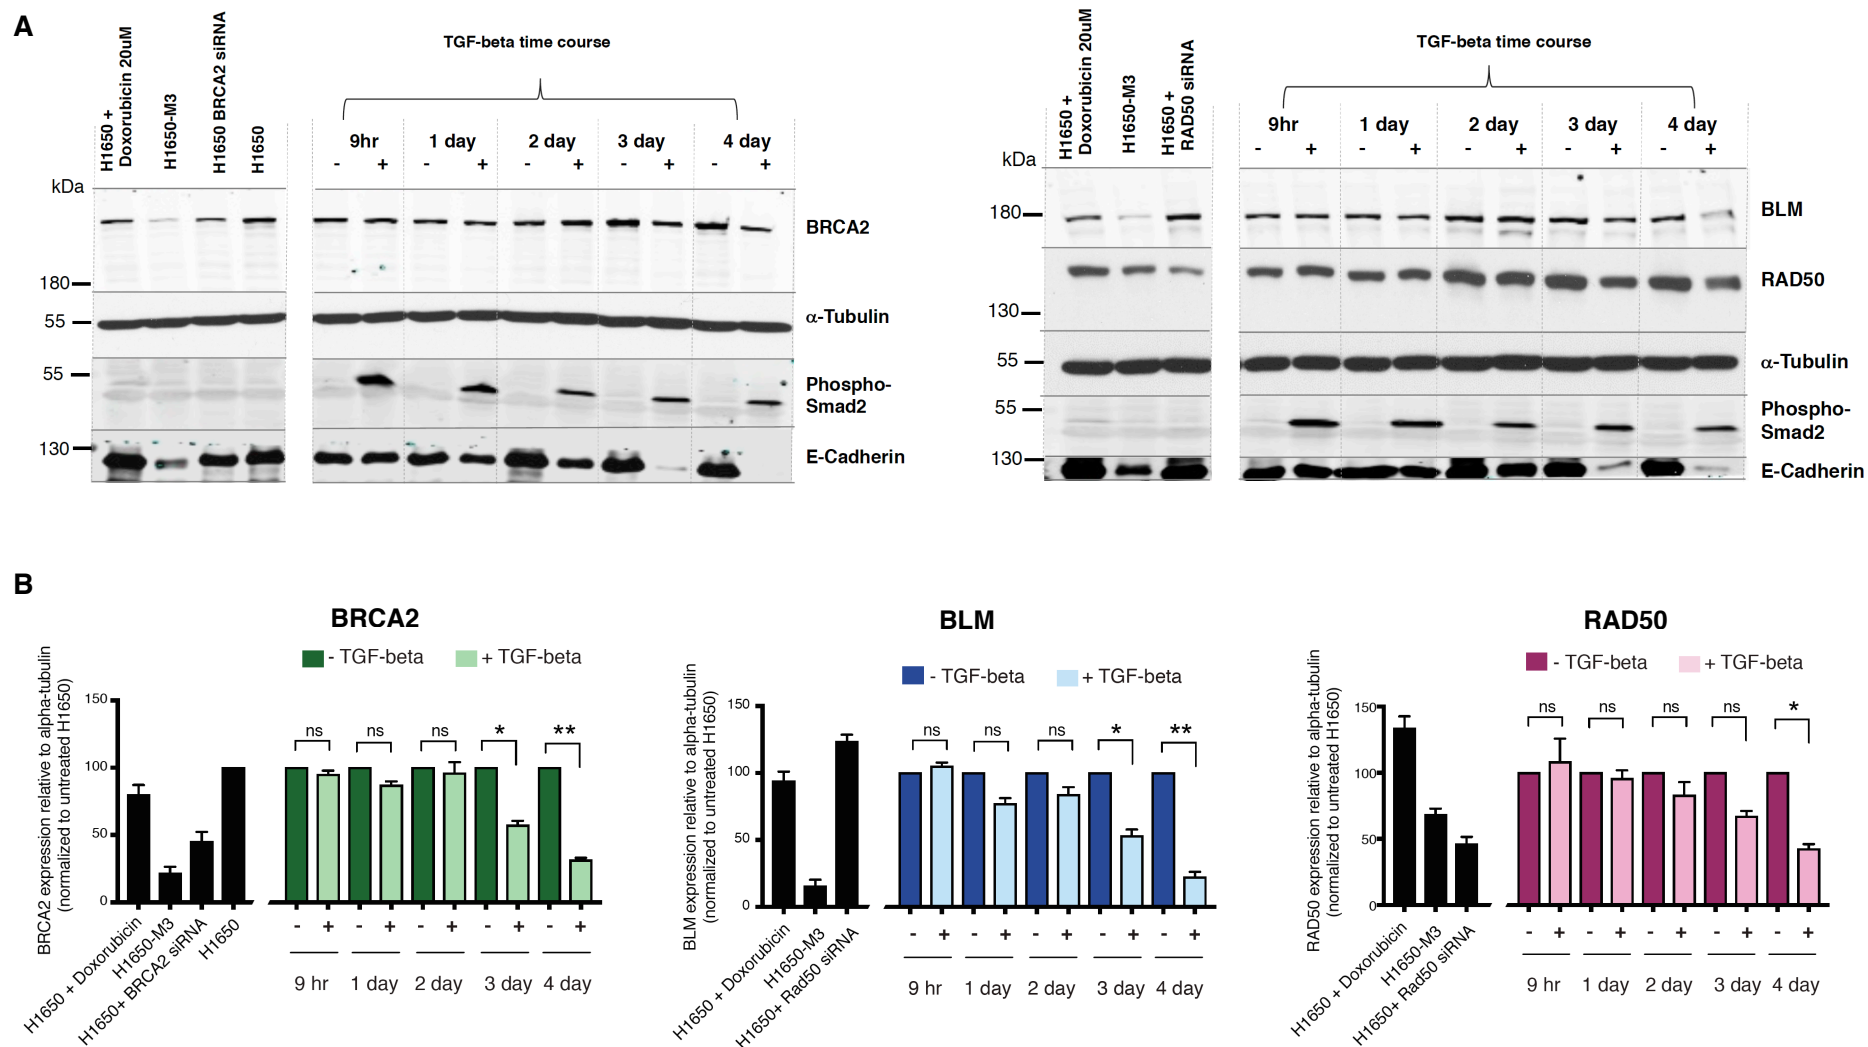

**Figure 3—figure supplement 3.**

**TGF-beta signaling control the expression of multiple HDR genes at protein level.**

**A.** Western blot analysis of expression of BRCA2, BLM and RAD50 upon vehicle or TGF-beta treatment (9hr, 1day, 2day, 3day, 4day) in H1650 cells. Phospho-Smad2 and E-cadherin are used as marker of active TGF-beta signaling and MET, respectively. Alpha-Tubulin is used as a loading control.

**B.** The charts depict quantification of relative amount of BRCA2, BLM and RAD50. Levels of intensity of each band were quantified using imajeJ32 software, represented as a ratio of the protein of interest to alpha-Tubulin, and normalized to levels detected in respective TGF-beta untreated (-TGF-beta) samples. The data represents mean  $\pm$  SD from 2 independent experiments. p-value \* $<0.005$ , \*\*\* $<0.001$ , unpaired t-test with Welch's correction.
