# Supplementary material for: TGF-β reduces DNA ds-break repair mechanisms to heighten genetic diversity and adaptability of CD44+/CD24− cancer cells
Source: eLife journal article supplement (doi:10.7554/elife.21615), 2017-01-16
Supplement: supp [file elife_poa_e21615_Figure_3_figure_Supplement_4.pdf › elife_poa_e21615_Figure_3_figure_Supplement_4.pdf]

**A**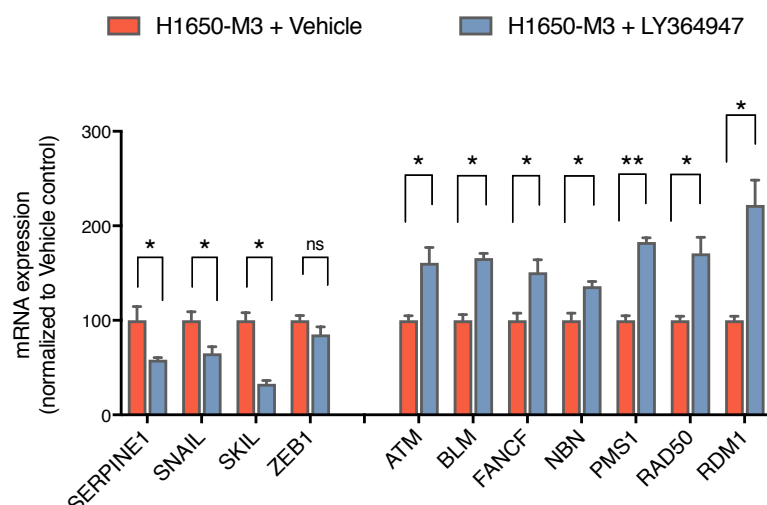**B**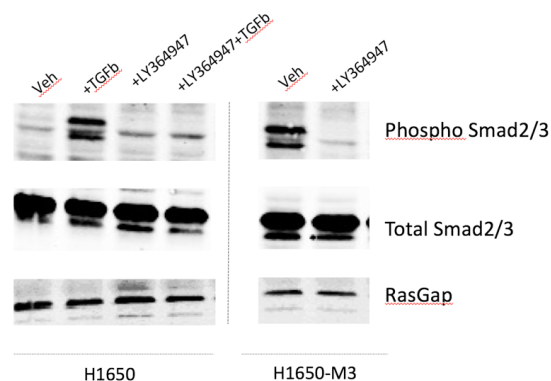

**Figure 3—figure supplement 4.**

**The inhibition of TGF-beta signaling in the CD44+/CD24- H1650-M3 cells results in an increased expression of HDR genes.**

**A.** TGF-beta receptor 1 (TβR1) kinase activity was blocked by treatment with 1 uM LY364947 (Selleckchem) for 48-72 hrs. Expression of TGF-beta signature genes were used as a control for the efficacy of LY364947 treatment. mRNA expression was quantified through SYBR-green-based RT-qPCR. Each bar represents mean ± SD of 3 replicates from 2 independent experiments (p-value \* < 0.05, \*\*< 0.005 paired t-test).

**B.** Western blot analysis of H1650 and H1650-M3 cells treated with LY364947 (1uM) shows that the inhibitor specifically inhibits TGF-beta signaling, as phosphorylation of Smad2 and Smad3 are repressed after 48 hours of treatment.
