# Supplementary material for: TGF-β reduces DNA ds-break repair mechanisms to heighten genetic diversity and adaptability of CD44+/CD24− cancer cells
Source: eLife journal article supplement (doi:10.7554/elife.21615), 2017-01-16
Supplement: supp [file elife_poa_e21615_Figure_3_figure_Supplement_5.pdf › elife_poa_e21615_Figure_3_figure_Supplement_5.pdf]

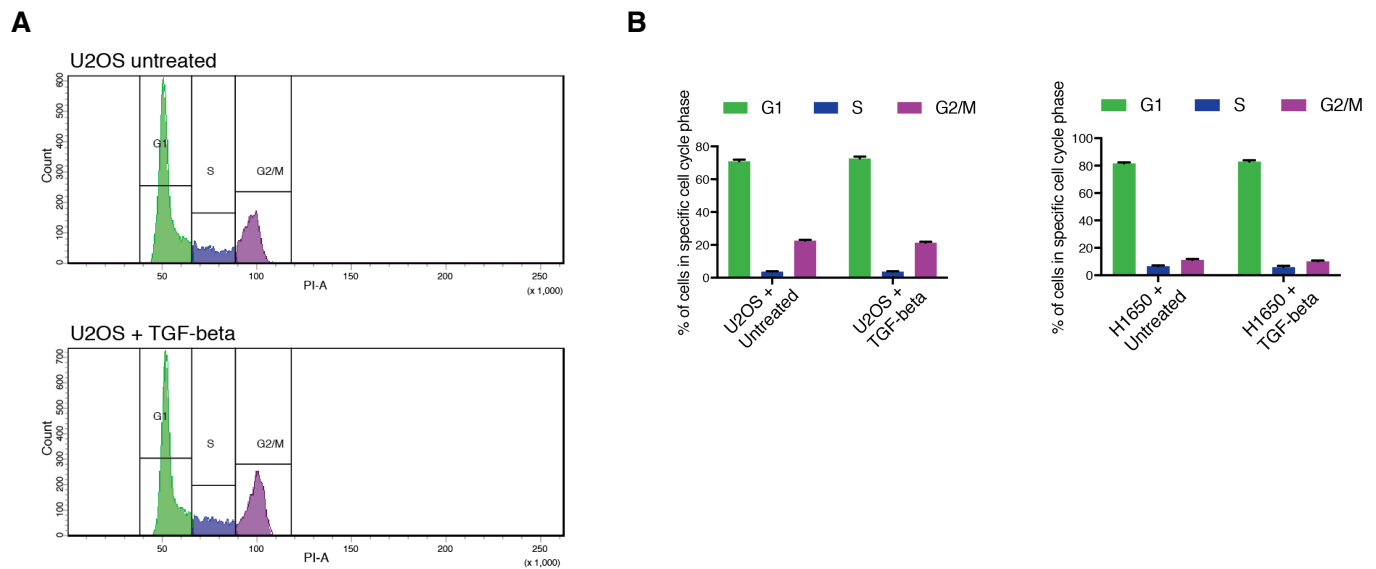

**Figure 3—figure supplement 5.**

**Exposure to TGF-beta does not alter the cell cycle distribution in cancer cell lines.**

**A.** TGF-beta treatment does not alter the cell cycle distribution in U2OS cells. Histogram represents U2OS cell cycle distribution without or with TGF-beta (1ng/ml of each of TGF-beta1 and TGF-beta2, 9hr). 10,000 cells were analyzed by FACS for each replicates of each sample.

**B.** Quantitation of cell cycle distribution from U2OS and H1650 cells upon 9hr treatment with TGF-beta (1ng/ml of each of TGF-beta1 and TGF-beta2. Each bar represents mean  $\pm$  SD of 3 replicates from 2 independent experiments.
