# Supplementary material for: TGF-β reduces DNA ds-break repair mechanisms to heighten genetic diversity and adaptability of CD44+/CD24− cancer cells
Source: eLife journal article supplement (doi:10.7554/elife.21615), 2017-01-16
Supplement: supp [file elife_poa_e21615_Figure_4_figure_Supplement_1.pdf › elife_poa_e21615_Figure_4_figure_Supplement_1.pdf]

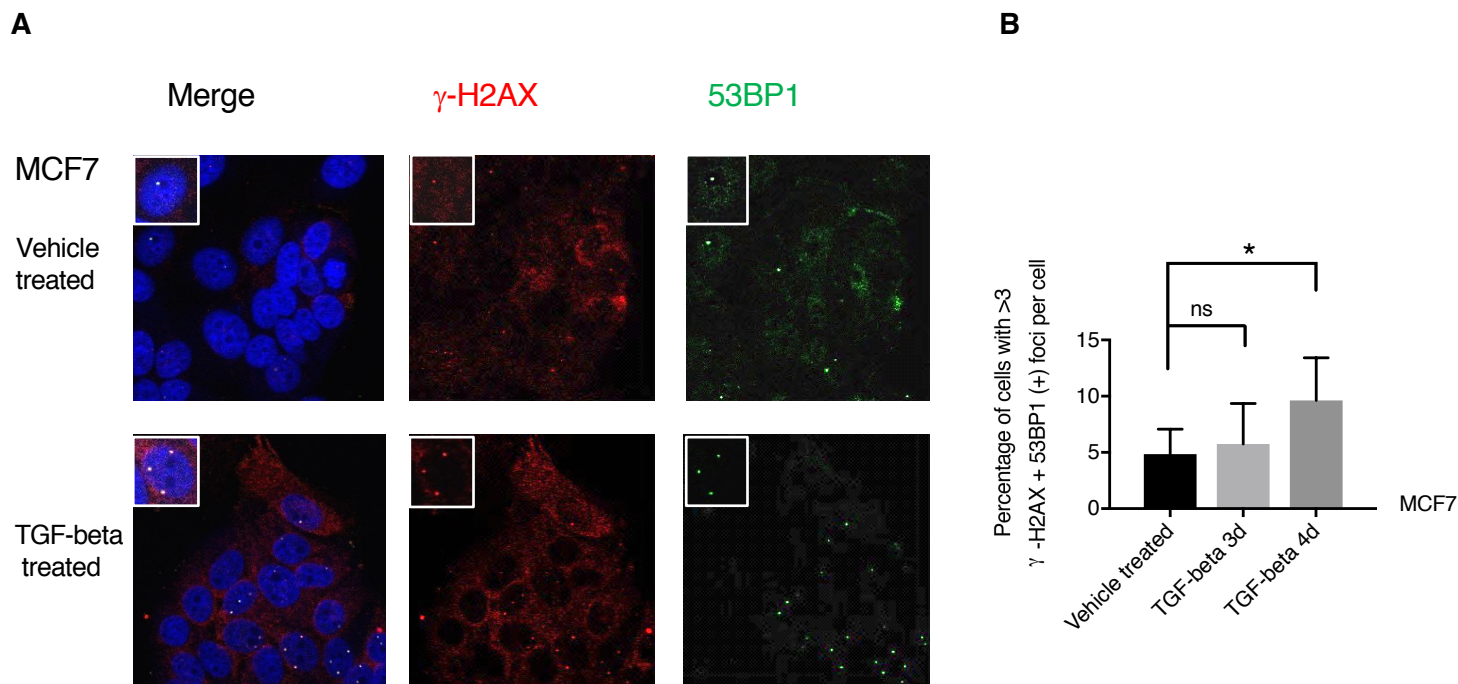

**Figure 4—figure supplement 1.**

**TGF-beta treatment increases the number of 53BP1/gamma-H2AX double-positive foci in MCF7 cells.**

**A.** MCF7 cells treated with TGF-beta (1ng/ml each of TGF-beta1 and TGF-beta2) or DMSO for 3days and 4 days were stained with antibodies against gamma-H2AX (red) and 53BP1 (green). DAPI (blue) was used as a counter-stain. Insets in the left upper corner show a representative nucleus.

**B.** The chart represents quantification of the experiment depicted in panel A. Each bar represents mean  $\pm$  SD of the percentage of cells with more than 3 gamma-H2AX and 53BP1 double-positive foci per field in Vehicle or TGF-beta treated cells. Approximately 10 fields were counted, for a total of 100 cells (n=100). (p-value  $< 0.005$ , paired t-test).
