# Supplementary material for: TGF-β reduces DNA ds-break repair mechanisms to heighten genetic diversity and adaptability of CD44+/CD24− cancer cells
Source: eLife journal article supplement (doi:10.7554/elife.21615), 2017-01-16
Supplement: supp [file elife_poa_e21615_Figure_4_figure_Supplement_2.pdf › elife_poa_e21615_Figure_4_figure_Supplement_2.pdf]

A

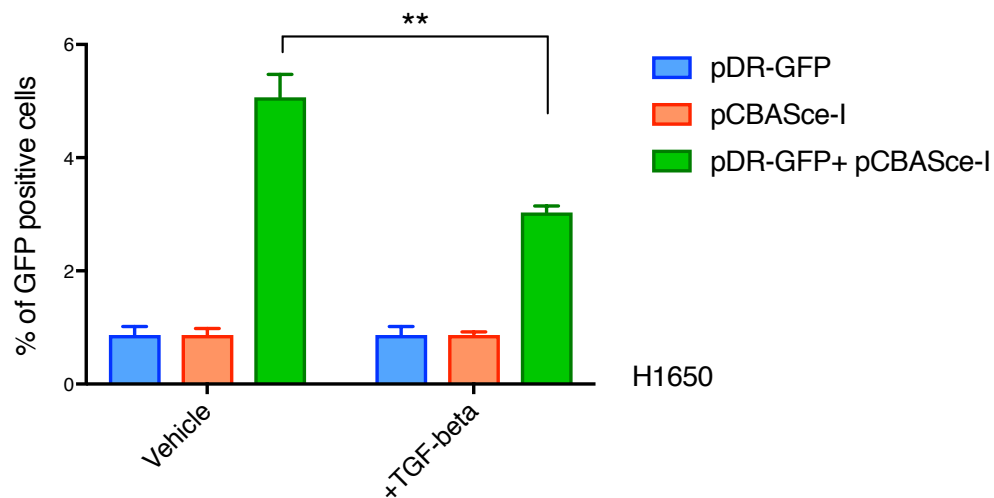

**Figure 4—figure supplement 2.**

**TGF-beta reduces the efficiency of homologous recombination in a DR-GFP assay in H1650 cells.**

**A.** The chart represents the percentage of GFP +ve cells upon transfection with pDR-GFP or pCBASce-I or both, under vehicle or TGF-beta treatment. Each bar represents mean  $\pm$  SD of 3 replicates from two independent experiments. (p-value \*\* < 0.005, unpaired t-test with desired FDR 1%)
