# Supplementary material for: TGF-β reduces DNA ds-break repair mechanisms to heighten genetic diversity and adaptability of CD44+/CD24− cancer cells
Source: eLife journal article supplement (doi:10.7554/elife.21615), 2017-01-16
Supplement: supp [file elife_poa_e21615_Figure_4_figure_Supplement_3.pdf › elife_poa_e21615_Figure_4_figure_Supplement_3.pdf]

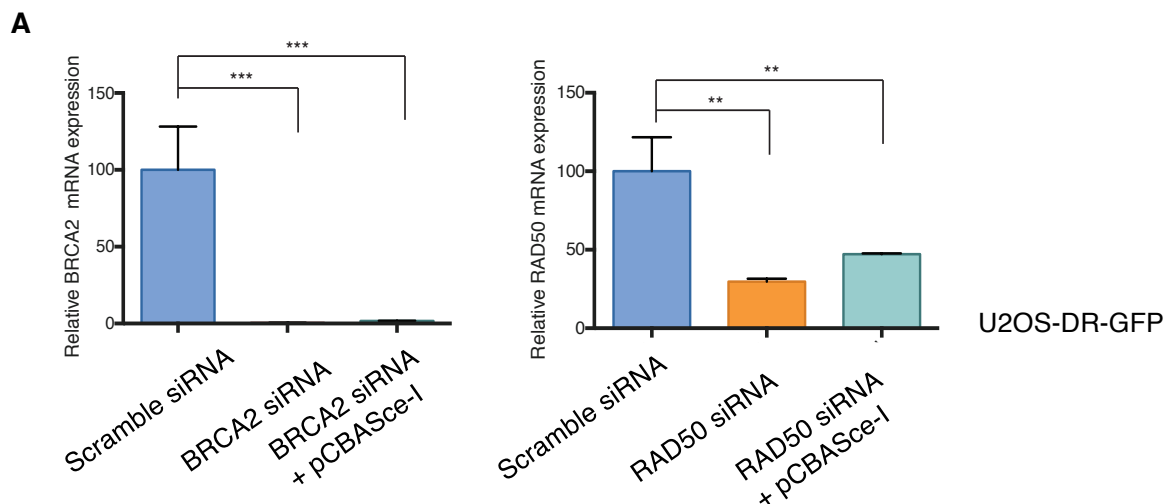

**Figure 4—figure supplement 3.**

**Knockdown efficiencies of the indicated siRNAs in U2OS-DR-GFP cells.**

**A.** Efficiency of knock down upon transfection with the indicated siRNA oligonucleotides, without or with pCBASce-I (plasmid expressing Sce-I endonuclease), and compared to scramble siRNA transfected control cells. Cells were collected 3 days post transfection and analyzed for expression of the indicated mRNA. Each bar represents mean  $\pm$  SD of 3 replicates from 2 independent experiments. p-value \*\*< 0.005, \*\*\*< 0.0005, paired t-test.
