# Supplementary material for: TGF-β reduces DNA ds-break repair mechanisms to heighten genetic diversity and adaptability of CD44+/CD24− cancer cells
Source: eLife journal article supplement (doi:10.7554/elife.21615), 2017-01-16
Supplement: supp [file elife_poa_e21615_Figure_7_figure_Supplement_1.pdf › elife_poa_e21615_Figure_7_figure_Supplement_1.pdf]

**A**

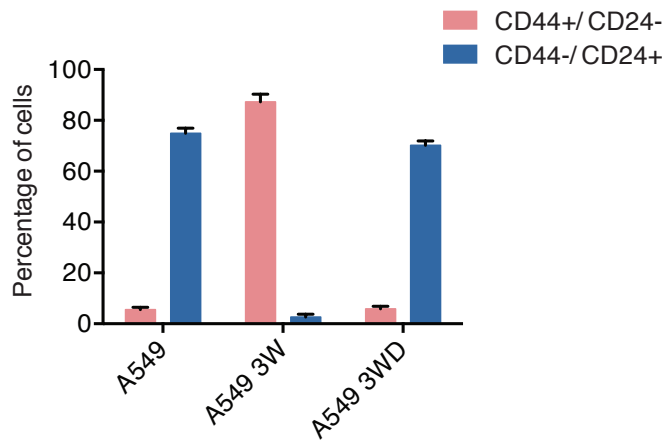

**Figure 7—figure supplement 1.**

**A549 cells undergo changes in surface expression of CD44 and CD24 before, during and post exposure to TGF-beta.**

**A.** The chart depicts the percentage of cells in CD44+/CD24- state and CD44-/CD24+ state, of A549 cell line, before, during and post exposure to TGF-beta. A549 cells before, during and post exposure to TGF-beta were stained for surface expression of CD44 and CD24 and analyzed by FACS. Each bar represents mean  $\pm$  SD of 3 replicates from 3 independent experiments. 10,000 cells were analyzed for each replicate of each sample.
