# Supplementary material for: TGF-β reduces DNA ds-break repair mechanisms to heighten genetic diversity and adaptability of CD44+/CD24− cancer cells
Source: eLife. 2017 Jan 16;6:e21615. doi: 10.7554/eLife.21615 (PMC5345931; doi:10.7554/eLife.21615)
Supplement: Supplementary file 2. — DOI: http://dx.doi.org/10.7554/eLife.21615.032 [file elife-21615-supp2.xlsx]

## Sheet: Sheet1
Supplementary File 2: Relative abundance of DNA damage/repair pathway components from gene expression profiles of H1650 and H1650-M3 cells
Base excision repair (BER)	DNA glycosylases: major altered base released	Chromosome location	Accession number	Fold difference in H1650-M3/H1650
UNG	U	12q24.11	NM_080911	0.775132
SMUG1	U	12q13.13	NM_014311	-0.415776
MBD4	U or T opposite G at CpG sequences	3q21.3	NM_003925	-0.189027
TDG	U, T or ethenoC opposite G	12q23.3	NM_003211	0.142342
OGG1	8-oxoG opposite C	3p25.3	NM_016821	0.734314
MUTYH (MYH)	A opposite 8-oxoG	1p34.1	NM_012222	0.328296
NTHL1 (NTH1)	Ring-saturated or fragmented pyrimidines	16p13.3	NM_002528	-0.332645
MPG	3-meA, ethenoA, hypoxanthine	16p13.3	NM_002434	0.388051
NEIL1	Removes thymine glycol	15q24.2	NM_024608	-0.227296
NEIL2	Removes oxidative products of pyrimidines	8p23.1	NM_145043	0.270568
NEIL3	Removes oxidative products of pyrimidines	4q34	NM_018248	N.A
Other BER and strand break joining factors
APEX1 (APE1)	AP endonuclease	14q11.2	NM_001641	-0.583183
APEX2	AP endonuclease	Xp11.21	NM_014481	0.647173
LIG3	DNA Ligase III	17q12	NM_013975	0.040315
XRCC1	LIG3 accessory factor	19q13.31	NM_006297	0.020297
PNKP	Converts some DNA breaks to ligatable ends	19q13.33	NM_007254	-0.371035
APLF (C2ORF13)	Accessory factor for DNA end-joining	2p13.3	NM_173545	N.A.
Poly(ADP-ribose) polymerase (PARP) enzymes that bind to DNA
PARP1 (ADPRT)	Protects strand interruptions	1q42.12	NM_001618	0.248699
PARP2 (ADPRTL2)	PARP-like enzyme	14q11.2	NM_005484	-0.86397
PARP3 (ADPRTL3)	PARP-like enzyme	3p21.1	NM_001003931	1.20183
Direct reversal of damage
MGMT	O6-meG alkyltransferase	10q26.3	NM_002412	1.00581
ALKBH2 (ABH2)	1-meA dioxygenase	12q24.11	NM_001001655	0.960464
ALKBH3 (DEPC1)	1-meA dioxygenase	11p11.2	NM_139178	0.296945
Repair of DNA-topoisomerase crosslinks
TDP1	Removes 3'-tyrosylphosphate and 3'-phosphoglycolate from DNA; human disorder SCAN1	14q32.11	NM_018319	0.582899
TDP2 (TTRAP)	5'- and 3'-tyrosyl DNA phosphodiesterase	6p22.3	NM_016614	N.A.
Mismatch excision repair (MMR)
MSH2	Mismatch (MSH2-MSH6) and loop (MSH2-MSH3) recognition	2p21	NM_000251	0.020256
	MSH2, MSH3, MSH6
MSH3		5q14.1	NM_002439	-0.143917
MSH6		2p16.3	NM_000179	0.115323
MLH1	MutL homologs, forming heterodimer	3p22.3	NM_000249	0.03897
	MLH1, PMS2
PMS2		7p22.1	NM_000535	0.131162
MSH4	MutS homologs specialized for meiosis	1p31.1	NM_002440	0.092521
	MSH4, MSH5
MSH5		6p21.33	NM_002441	N.A.
MLH3	MutL homologs of unknown function	14q24.3	NM_014381	N.A.
PMS1	MLH3, PMS1, PMS2L3	2q32.2	NM_000534	-0.781254
PMS2L3		7q11.23	NM_005395	N.A.
Nucleotide excision repair (NER)	(XP = xeroderma pigmentosum)
XPC	Binds DNA distortions	3p25.1	NM_004628	-0.299439
	XPC, RAD23B, CETN2
RAD23B		9q31.2	NM_002874	0.31402
CETN2		Xq28	NM_004344	0.784509
RAD23A	Substitutes for RAD23B	19p13.13	NM_005053	1.05913
XPA	Binds damaged DNA in preincision complex	9q22.33	NM_000380	-0.155819
DDB1	Complex defective in XP group E	11q12.2	NM_001923	0.085907
	DDB1, DDB2
DDB2 (XPE)		11p11.2	NM_000107	-0.131683
RPA1	Binds DNA in preincision complex	17p13.3	NM_002945	-0.110412
	RPA1, RPA2, RPA3
RPA2		1p35.3	NM_002946	0.57469
RPA3		7p21.3	NM_002947	0.07912
TFIIH	Catalyzes unwinding in preincision complex
ERCC3 (XPB)	3' to 5' DNA helicase	2q14.3	NM_000122	0.142906
ERCC2 (XPD)	5' to 3' DNA helicase	19q13.32	NM_000400	0.94961
GTF2H1	Core TFIIH subunit p62	11p15.1	NM_005316	-0.522659
GTF2H2	Core TFIIH subunit p44	5q13.2	NM_001515	-0.365265
GTF2H3	Core TFIIH subunit p34	12q24.31	NM_001516	-0.151812
GTF2H4	Core TFIIH subunit p52	6p21.33	NM_001517	1.24261
GTF2H5 (TTDA)	Core TFIIH subunit p8	6p25.3	NM_207118	1.13146
CDK7	Kinase subunits of TFIIH	5q13.2	NM_001799	0.386763
	CDK7, CCNH, MNAT1
CCNH		5q14.3	NM_001239	-0.042061
MNAT1		14q23.1	NM_002431	N.A.
ERCC5 (XPG)	3' incision	13q33.1	NM_000123	N.A.
ERCC1	5' incision DNA binding subunit	19q13.32	NM_001983	-0.546278
ERCC4 (XPF)	5' incision catalytic subunit	16p13.12	NM_005236	0.133913
LIG1	DNA ligase	19q13.32	NM_000234	-0.571736
NER-related
ERCC8 (CSA)	Cockayne syndrome and UV-Sensitive Syndrome; Needed for transcription-coupled NER	5q12.1	NM_000082	-0.093067
	ERCC8, ERCC6, UV-sensitive syndrome
ERCC6 (CSB)		10q11.23	NM_000124	0.212394
UVSSA (KIAA1530)		4p16.3	NM_020894
XAB2 (HCNP)	XAB2	19p13.2	NM_020196	-0.042208
MMS19	Iron-sulfur cluster loading and transport	10q24.1	NM_022362	0.539639
Homologous recombination
RAD51	Homologous pairing	15q15.1	NM_002875	0.55555
RAD51B	Rad51 homolog	14q24.1	NM_002877	N.A.
RAD51D	Rad51 homolog	17q12	NM_002878	N.A.
DMC1	Rad51 homolog, meiosis	22q13.1	NM_007068	1.23828
XRCC2	DNA break and crosslink repair	7q36.1	NM_005431	-0.380922
	XRCC2, XRCC3
XRCC3		14q32.33	NM_005432	0.32855
RAD52	Accessory factors for recombination	12p13.33	NM_002879	0.373268
	RAD52, RAD54L, RAD54B
RAD54L		1p34.1	NM_003579	-0.007567
RAD54B		8q22.1	NM_012415	0.643093
BRCA1	Accessory factor for transcription and recombination, E3 Ubiquitin ligase	17q21.31	NM_007295	-0.215757
SHFM1 (DSS1)	BRCA2 associated	7q21.3	NM_006304	0.1024
RAD50	ATPase in complex with MRE11A, NBS1	5q23.3	NM_005732	-1.39295
MRE11A	3' exonuclease, defective in ATLD (ataxia-telangiectasia-like disorder)	11q21	NM_005590	-0.377229
NBN (NBS1)	Mutated in Nijmegen breakage syndrome	8q21.3	NM_002485	-0.65881
RBBP8 (CtIP)	Promotes DNA end resection	18q11.2	NM_002894	0.467486
MUS81	Subunits of structure-specific DNA nuclease	11q13.1	NM_025128	0.79494
	MUS81, EME1, EME2
EME1 (MMS4L)		17q21.33	NM_152463	0.12548
EME2		16p13.3	NM_001010865	-0.079306
GIYD1 (SLX1A)	subunit of SLX1-SLX4 structure-specific nuclease, two identical tandem genes in the human genome	16p11.2	NM_001014999	N.A.
GIYD2 (SLX1B)		16p11.2	NM_024044	N.A.
GEN1	Nuclease cleaving Holliday junctions	2p24.2	NM_182625	N.A.
Fanconi anemia	Tolerance and repair of DNA crosslinks and other adducts in DNA
FANCA	FANCA	16q24.3	NM_000135	0.053507
FANCB	FANCB	Xp22.31	NM_152633	0.147744
FANCC	FANCC	9q22.32	NM_000136	-0.139004
BRCA2 (FANCD1)	Cooperation with RAD51, essential function	13q13.1	NM_000059	-1.13823
FANCD2	target for monoubiquitination	3p25.3	NM_033084	-0.147197
FANCE	FANCE	6p21.31	NM_021922	0.114889
FANCF	FANCF	11p14.3	NM_022725	-1.31799
FANCG (XRCC9)	FANCG	9p13.3	NM_004629	-0.240276
FANCI (KIAA1794)	target for monoubiquitination	15q26.1	NM_018193	0.487675
BRIP1 (FANCJ)	DNA helicase, BRCA1-interacting	17q23	NM_032043	-0.212342
FANCL	FANCL	2p16.1	NM_018062	-0.094196
FANCM	helicase/translocase	14q21.3	NM_020937	-0.065239
PALB2 (FANCN)	co-localizes with BRCA2 (FANCD1)	16p12.1	NM_024675	0.663771
RAD51C (FANCO)	Rad51 homolog FANCO	17q23.2	NM_002876	N.A.
BTBD12 (SLX4) (FANCP)	nuclease subunit/scaffold BTBD12 (SLX4) FANCP	16p13.3	NM_032444	-0.141788
FAAP20 (C1orf86)	FANCA - associated	1p36.33	NM_182533.2	N.A.
FAAP24 (C19orf40)	FAAP24	19q13.11	NM_152266	N.A.
Non-homologous end-joining
XRCC6 (Ku70)	DNA end binding subunit	22q13.2	NM_001469	-0.089238
XRCC5 (Ku80)	DNA end binding subunit	2q35	NM_021141	0.21164
PRKDC	DNA-dependent protein kinase catalytic subunit	8q11.21	NM_006904	0.068425
LIG4	Ligase	13q33.3	NM_002312	N.A.
XRCC4	Ligase accessory factor	5q14.2	NM_003401	0.144469
DCLRE1C (Artemis)	Nuclease	10p13	NM_022487	-0.453611
NHEJ1 (XLF, Cernunnos)	End-joining factor	2q35	NM_024782	0.845515
Modulation of nucleotide pools
NUDT1 (MTH1)	8-oxoGTPase	7p22.3	NM_002452	0.764606
DUT	dUTPase	15q21.1	NM_001948	-0.293614
RRM2B (p53R2)	p53-inducible ribonucleotide reductase small subunit 2 homolog	8q22.3	NM_015713	0.146515
DNA polymerases (catalytic subunits)
POLB	BER in nuclear DNA	8p11.21	NM_002690	0.146157
POLG	BER in mitochondrial DNA	15q26.1	NM_002693	0.147314
POLD1	NER and MMR	19q13.33	NM_002691	-0.158895
	POLD1, POLE1
POLE		12q24.33	NM_006231	-0.095026
PCNA	Sliding clamp for pol delta and pol epsilon	20p12.3	NM_002592	-0.67326
REV3L (POLZ)	DNA pol zeta catalytic subunit, essential function	6q21	NM_002912	N.A.
MAD2L2 (REV7)	DNA pol zeta subunit	1p36.22	NM_006341	1.27717
REV1L (REV1)	dCMP transferase	2q11.2	NM_016316	N.A.
POLH	xeroderma pigmentosum (XP) variant	6p21.1	NM_006502	-0.484271
POLI (RAD30B)	Lesion bypass	18q21.2	NM_007195	-0.260309
POLQ	Sensitivity to ionizing radiation	3q13.33	NM_199420	-0.254349
POLK (DINB1)	Lesion bypass and NER	5q13.3	NM_016218	-0.244535
POLL	Gap-filling during non-homologous end-joining	10q24.32	NM_013274	0.092207
POLM	Gap filling during non-homologous end-joining	7p13	NM_013284	-0.318567
POLN (POL4P)	DNA crosslink repair?	4p16.3	NM_181808	-0.028259
Editing and processing nucleases
FEN1 (DNase IV)	5' nuclease	11q12.2	NM_004111	0.40317
FAN1 (MTMR15)	5' nuclease interacting with FANCD2	15q13.2	NM_014967	N.A.
TREX1 (DNase III)	3' exonuclease	3p21.31	NM_033629	0.735128
TREX2	3' exonuclease	Xq28	NM_007205	0.957069
EXO1 (HEX1)	5' exonuclease	1q43	NM_003686	0.025803
APTX (aprataxin)	Processing of DNA single-strand interruptions	9p21.1	NM_175073	-0.199556
SPO11	endonuclease	20q13.32	NM_012444	0.040363
ENDOV	incision 3' of hypoxanthine and uracil in DNA and inosine in RNA	17q25.3	NM_173627	N.A.
Ubiquitination and modification
UBE2A (RAD6A)	Ubiquitin-conjugating enzyme	Xq24-q25	NM_003336	0.14377
UBE2B (RAD6B)	Ubiquitin-conjugating enzyme	5q31.1	NM_003337	0.16645
RAD18	E3 ubiquitin ligase	3p25.3	NM_020165	0.471357
SHPRH	E3 ubiquitin ligase, SWI/SNF related, homolog of S. cerevisiae Rad5	6q24.3	NM_001042683	0.230405
HLTF (SMARCA3)	E3 ubiquitin ligase, SWI/SNF related, homolog of S. cerevisiae Rad5	3q25.1-q26.1	NM_003071	0.089866
RNF168	E3 ubiquitin ligase for DSB repair; ATM-like and RIDDLE syndrome	3q29	NM_152617	0.073162
SPRTN (c1orf124)	Reads ubiquitylation	1q42.12-q43	NM_032018	N.A.
RNF8	E3 ubiquitin ligase for DSB repair	6p21	NM_152617	-0.262804
RNF4	E3 ubiquitin ligase	4p16.3	NM_001185009	0.82682
UBE2V2 (MMS2)	Ubiquitin-conjugating complex	8q11.21	NM_003350	0.00525
	UBE2V2, UBE2N
UBE2N (UBC13)		12q22	NM_003348	0.2532
Chromatin Structure and Modification
H2AFX (H2AX)	Histone, phosphorylated after DNA damage	11q23.3	NM_002105	0.124957
CHAF1A (CAF1)	Chromatin assembly factor	19p13.3	NM_005483	0.1742
SETMAR (METNASE)	DNA damage-associated histone methylase and nuclease	3p26	NM_006515	0.491185
Genes defective in diseases associated with sensitivity to DNA damaging agents
BLM	Bloom syndrome helicase	15q26.1	NM_000057	-0.688817
WRN	Werner syndrome helicase / 3' - exonuclease	8p12	NM_000553	-1.58086
RECQL4	Rothmund-Thompson syndrome	8q24.3	NM_004260	0.216306
ATM	ataxia telangiectasia	11q22.3	NM_000051	-0.879238
TTDN1 (C7orf11)	non-photosensitive form of trichothiodystrophy	7p14	NM_138701	N.A.
Other identified genes with known or suspected DNA repair function	Top of Page
DCLRE1A (SNM1)	DNA crosslink repair	10q25.3	NM_014881	-0.466325
DCLRE1B (SNM1B)	Related to SNM1	1p13.2	NM_022836	1.01506
RPA4	Similar to RPA2	Xp21.33	NM_013347	0.202942
PRPF19 (PSO4)	DNA crosslink repair; binding to SETMAR	11q12.2	NM_014502	0.113619
RECQL (RECQ1)	DNA helicase	12p12.1	NM_002907	-0.379433
RECQL5	DNA helicase	17q25.1	NM_001003715	0.247131
HELQ (HEL308)	DNA helicase	4q21.23	NM_133636	N.A.
RDM1 (RAD52B)	Similar to RAD52	17q12	NM_145654	Error! Not a valid link.
OBFC2B (SSB1)	Single-stranded DNA binding protein	12q13.2	NM_024068	0.553265
Other conserved DNA damage response genes
ATR	ATM- and PI-3K-like essential kinase	3q23	NM_001184	-0.567209
ATRIP	ATR-interacting protein	3p21.31	NM_130384	0.410117
MDC1	Mediator of DNA damage checkpoint	6p21.3	NM_014641	1.53291
RAD1	subunits of PCNA-like sensor of damaged DNA	5p13.2	NM_002853	0.816869
	RAD1, RAD9, HUS1
RAD9A		11q13.2	NM_004584	-0.282441
HUS1		7p12.3	NM_004507	0.502065
RAD17 (RAD24)	RFC-like DNA damage sensor	5q13.2	NM_002873	0.232647
CHEK1	Effector kinases	11q24.2	NM_001274	0.898455
	CHEK1, CHEK2
CHEK2		22q12.1	NM_007194	0.109923
TOPBP1	DNA damage checkpoint control	3q22.1	NM_007027	0.105324
CLK2	S-phase check point and biological clock protein	1q21	NM_003993	-0.468254
PER1	S-phase check point and biological clock protein	17p12	NM_002616	N.A.
