# Supplementary material for: TGF-β reduces DNA ds-break repair mechanisms to heighten genetic diversity and adaptability of CD44+/CD24− cancer cells
Source: eLife. 2017 Jan 16;6:e21615. doi: 10.7554/eLife.21615 (PMC5345931; doi:10.7554/eLife.21615)
Supplement: Supplementary file 3. — DOI: http://dx.doi.org/10.7554/eLife.21615.033 [file elife-21615-supp3.xlsx]

## Sheet: Sheet1
Supplementary File 3: Sequences of primers used in quantitative-RT-PCR in this study
GENE NAME	PRIMER NAME	PRIMER SEQUNECE
IL6	Forward Primer (5' -> 3')	AACCTGAACCTTCCAAAGATGC
	Reverse Primer (5' -> 3')	TCTGGCTTGTTCCTCACTACT
BRCA1	Forward Primer (5' -> 3')	TTGTTACAAATCACCCCTCAAGG
	Reverse Primer (5' -> 3')	CCCTGATACTTTTCTGGATGCC
ORC5L	Forward Primer (5' -> 3')	GAATTGGCTGACAGAAATGTGAC
	Reverse Primer (5' -> 3')	TTTGAAGGTTGCCTATGCTGTAA
RPA2	Forward Primer (5' -> 3')	GCACCTTCTCAAGCCGAAAAG
	Reverse Primer (5' -> 3')	CCCCACAATAGTGACCTGTGAAA
RFC3	Forward Primer (5' -> 3')	CTTCCTTCACAACTGGCTCAT
	Reverse Primer (5' -> 3')	TGCAGGCTTCACACATAAGCA
POLS	Forward Primer (5' -> 3')	GCCTATATCGCCAAAGAGGAGA
	Reverse Primer (5' -> 3')	CTCCGGCCAACGTCATTCC
ERCC8	Forward Primer (5' -> 3')	AGCAAACACTGCTCATAATGGG
	Reverse Primer (5' -> 3')	GAACTATTCCAGAGCCTCATTCG
ATM	Forward Primer (5' -> 3')	TTGATCTTGTGCCTTGGCTAC
	Reverse Primer (5' -> 3')	TATGGTGTACGTTCCCCATGT
ATR	Forward Primer (5' -> 3')	GCCCACTGACAAGGAACTGAG
	Reverse Primer (5' -> 3')	AGCTCTTCCCATTCGTCATCA
BLM	Forward Primer (5' -> 3')	CAGACTCCGAAGGAAGTTGTATG
	Reverse Primer (5' -> 3')	TTTGGGGTGGTGTAACAAATGAT
BRCA2	Forward Primer (5' -> 3')	TGCCTGAAAACCAGATGACTATC
	Reverse Primer (5' -> 3')	AGGCCAGCAAACTTCCGTTTA
FANCF	Forward Primer (5' -> 3')	GAACCCGGCATCCACAAATCA
	Reverse Primer (5' -> 3')	GTGGCGGCTAGTCACTAAAGT
NBN	Forward Primer (5' -> 3')	CACTCACCTTGTCATGGTATCAG
	Reverse Primer (5' -> 3')	CTGCTTCTTGGACTCAACTGC
PMS1	Forward Primer (5' -> 3')	GCAGATGACCAAAGATACAGTGG
	Reverse Primer (5' -> 3')	CTGCTACTCCATAGAATGGGAGA
RAD50	Forward Primer (5' -> 3')	AAGTGTGCAGAAATTGACCGAG
	Reverse Primer (5' -> 3')	GACGTACCTGCCGAAGTGTT
RDM1	Forward Primer (5' -> 3')	ACCTTTTGCGGTTCCCATC
	Reverse Primer (5' -> 3')	AGACCCGGACTGAATACAGAA
WRN	Forward Primer (5' -> 3')	CACAGCAGCGGAAATGTCCT
	Reverse Primer (5' -> 3')	GAGCAATCACTAGCATCGTAACT
CTGF	Forward Primer (5' -> 3')	CTTGCGAAGCTGACCTGGAA
	Reverse Primer (5' -> 3')	AAAGCTCAAACTTGATAGGCTTGGA
SERPINE	Forward Primer (5' -> 3')	ATTCAAGCAGCTATGGGATTCAA
	Reverse Primer (5' -> 3')	CTGGACGAAGATCGCGTCTG
SKIL	Forward Primer (5' -> 3')	GTTAAGCGAACCTGTACTTCTGT
	Reverse Primer (5' -> 3')	GTAGGCGACATGCTTTCTTGG
TGFB1	Forward Primer (5' -> 3')	GGCCAGATCCTGTCCAAGC
	Reverse Primer (5' -> 3')	GTGGGTTTCCACCATTAGCAC
TGFB2	Forward Primer (5' -> 3')	CCATCCCGCCCACTTTCTAC
	Reverse Primer (5' -> 3')	AGCTCAATCCGTTGTTCAGGC
TGFBR1	Forward Primer (5' -> 3')	GGCCAAATATCCCAAACAGA
	Reverse Primer (5' -> 3')	TGATGCCTTCCTGTTGACTG
TWIST	Forward Primer (5' -> 3')	CCGGAGACCTAGATGTCATTG
	Reverse Primer (5' -> 3')	CACGCCCTGTTTCTTTGAAT
ZEB1	Forward Primer (5' -> 3')	GCACCTGAAGAGGACCAGAG
	Reverse Primer (5' -> 3')	TGCATCTGGTGTTCCATTTT
ZEB2	Forward Primer (5' -> 3')	TCCTGTCTGTCTCGCAAAAA
	Reverse Primer (5' -> 3')	GCCTTGAGTGCTCGATAAGG
SNAI1	Forward Primer (5' -> 3')	CTCTAGGCCCTGGCTGCTAC
	Reverse Primer (5' -> 3')	TGACATCTGAGTGGGTCTGG
SNAI2	Forward Primer (5' -> 3')	CCCTGAAGATGCATATTCGGAC
	Reverse Primer (5' -> 3')	CTTCTCCCCCGTGTGAGTTCTA
GAPDH	Forward Primer (5' -> 3')	GGCTGAGAACGGGAAGCTTGTCAT
	Reverse Primer (5' -> 3')	CAGCCTTCTCCATGGTGGTGAAGA
